# Supplementary material
Source: publisher figshare collection journal article supplement (https://gsapubs.figshare.com/ndownloader/files/22744538)
Supplement: Supplementary file 1 [file 22744538]

## **GSA DATA REPOSITORY item 2004104**

In this data repository we expand our discussion of our methods for identifying and projecting channel segments. We extracted channel profiles for 97 tributaries to the Red River with drainage area  $>40 \text{ km}^2$  from 90 m DEM data (Figs. DR1 and DR2, see Fielding et al., 1994 for dataset details). Channels segments were identified, and a concavity ( $\lambda$ ) and normalized steepness ( $k_s$ ) determined for each using methods developed by Snyder et al. (2000), Kirby and Whipple (2000) and Kirby et al. (2003). Concavity was determined by a linear best fit to slope-area data on a log-log plot over the drainage area corresponding to the channel segment. Because steepness index is highly correlated to concavity, a normalized steepness was determined over the same drainage area, but with a fixed concavity of 0.45. The actual value we use matters little, but this value is within the range of commonly reported concavities (Tucker and Whipple, 2002).

### **Channel segment categorization**

Channel segments within each profile were then categorized as upper, middle or lower segments (Fig. DR2 and Table DR1). We used a number of criteria in this identification, including position along the channel, channel concavity and normalized steepness, and relationship to our field and DEM-based observations of the various landscape components.

Upper segments are consistently low in concavity (most in the range 0.2 to 0.6) and low in slope (most in the range 20 to 60), and of course always occur in the uppermost part of the tributary profile. Some channel segments which fit these criteria, however, were rejected because they corresponded to a region where, based on DEM analysis or field observation, the relict landscape has been removed. In such cases, these channel segments were categorized instead as middle segments.

Middle channel segments usually have a concavity less than 1 (for 89% of channel segments) and a normalized steepness index less than 150 (for 82% of channel segments). An upper channel segment may be present upstream of the middle segment and a lower channel segment is always present downstream. In many cases, we identified two middle channel segments which have slightly different channel parameters and are separated by an internal knickpoint. These internal knickpoints may reflect a wide range of factors, including, most importantly, lithology

and data noise, but given the regional coherence of the three-segment pattern and the relative consistency of channel parameters across these internal knickpoint, we do not think this causes difficulty for our overall analysis. In these cases, parameters for both segments are retained in Table DR1 and for determination of mean parameters.

Lower channel segments must exist in every tributary profile. Concavity in these segments is usually greater than 1 (for 87% of channel segments) and normalized steepness is greater than 150 (for 94% of channel segments). We also observed a number of examples in which segments we categorize as lower channel segments are separated by an internal knickpoint. Again, we do believe this causes difficulty for our analysis.

In a number of channels (15), which we refer to as “fully equilibrated” channels, we observed no discernible knickpoints.

### **Channel segment projection**

We were able to fit and project upper and middle channel segments for 28 and 30 profiles respectively (Table DR2 and Fig. DR3). Using mean concavity values of 0.38 for the upper segments and 0.64 for the lower segments, we obtained a linear best fit to the slope-drainage area data over a specified drainage area range corresponding to the channel segments (same as for determining steepness index with a fixed concavity, described above). Uncertainty was determined based on the standard deviation of slope and area data and propagated through the steepness index calculation. Using this steepness index, the input concavity and the drainage area data downstream of the channel segment, we projected the channel profile to its confluence with the Red River. We repeated this for the maximum and minimum steepness index values based on the steepness index uncertainty. Total incision, incision recorded by the upper channel segments (stage 1), incision recorded by the middle channel segments (stage 2) and the ratio of stage 2 to stage 1 incision are calculated (Table DR2). All possible upper and middle channel segments were projected. Reasons for not projecting channels include: (1) insufficient data for a meaningful regression; (2) too much scatter in the data for a meaningful regression; (3) drainage area is too large, different processes may be operating on these channels compared to shorter

tributaries, and therefore comparison is inappropriate; or (4) there are multiple channel segments.

## REFERENCES

- Fielding, E., Isacks, B., Barazangi, M., Duncan, C., 1994, How flat is Tibet?: *Geology*, v. 22, p. 163-167.
- Kirby, E., and Whipple, K.X., 2001, Quantifying differential rock-uplift rates via stream profile analysis: *Geology*, v. 29, p. 415-418.
- Kirby, E., Whipple, K.X., Tang W., and Chen Z., 2003, Distribution of active rock uplift along the eastern margin of the Tibetan Plateau: Inferences from bedrock channel longitudinal profiles, *Journal of Geophysical Research*, v. 108, doi:10.1029/2001JB000861.
- Snyder, N.P., Whipple, K.X., Tucker, G.E., and Merritts, D.J., 2000, Landscape response to tectonic forcing: DEM analysis of stream profiles in the Mendocino triple junction region, northern California: *Geological Society of America Bulletin*, v. 112, p. 1250-1263.
- Tucker, G.E., and Whipple, K.X., 2002, Topographic outcomes predicted by stream erosion models: Sensitivity analysis and intermodel comparison: *Journal of Geophysical Research*, v. 107, doi:10.1029/2001JB000162.

## FIGURE CAPTIONS

Figure DR1. Red River drainage network derived from 90 m DEM (see Fielding et al. (1994) for dataset details). Trunk channel shown with a heavy weight line, analyzed tributaries with a medium weight line and additional, non-analyzed tributaries with a fine weight line.

Figure DR2. Longitudinal profiles for 97 tributaries to the Red River in China, tributary locations shown in Figure DR1. Channel segment categorization is indicated by a colored box, with blue for upper channel segments, green for middle channel segments and red for lower channel segments. Fully equilibrated channels are indicated with a purple box. Numbers within each box indicate the concavity and the normalized steepness index (separated by a slash) for each channel segment. This data is tabulated in Table DR1. Channel segment boxes without steepness index or concavity values correspond to cases in which the channel segment was too short and therefore contained too few data points for a meaningful regression, or cases in which there was too much scatter in the data for a meaningful regression. Tributaries are labeled if they are fully equilibrated, if they are of the two-segment morphology, or if a channel segment is projected. If an appropriate channel segment is not projected, the reason is given in the label. See text for further explanation. Tributaries are arranged roughly according to upstream distance with Ailao Shan tributaries on the left hand side of the figure and Yangtze Plateau tributaries on the right hand side. Position of the Red River fault marked on Ailao Shan tributaries. Bend in the Red River fault occurs approximately between tributaries 54 and 55.

Figure DR3. Projected channel segments for 44 tributaries to the Red River. Longitudinal profile data shown in plots on left hand side with projected channel segments for upper and/or middle channel segments indicated with a solid line, and uncertainty indicated with dashed line. Elevations of projected intersections with the Red River are tabulated in Table DR2. Slope-area data for longitudinal profiles shown in plots on right hand side with fit used to determine steepness index indicated with solid lines and uncertainty indicated with dashed lines. Concavity and steepness values differ between Table DR1/Figure DR2 and Figure DR3 because concavity for DR2 is determined by a best fit to the data and steepness is determined with a fixed concavity of 0.45, while for figure DR3, concavity is a fixed value of 0.38 for upper segments and 0.64 for middle segments, and steepness values are determined using these fixed concavities.

TABLE DR1. NORMALIZED STEEPNESS AND CONCAVITY VALUES, ALL CHANNEL SEGMENTS

| Tributary Number | Upper Concavity <sup>†</sup> | Upper Steepness <sup>‡</sup> | Middle Concavity | Middle Steepness | Lower Concavity | Lower Steepness | Channel location and type <sup>§</sup> |
|------------------|------------------------------|------------------------------|------------------|------------------|-----------------|-----------------|----------------------------------------|
| 1 (u,m)          | 0.63                         | 31                           | 0.73             | 197              | 14.00           | 419             | Yunnan Plateau                         |
|                  |                              |                              |                  |                  | 4.20            | 273             |                                        |
| 2 (m)            |                              |                              | 0.52             | 126              | 1.10            | 279             | Ailao Shan                             |
|                  |                              |                              |                  |                  | 9.10            | 162             |                                        |
| 3 (m)            |                              |                              | 0.42             | 106              | 2.00            | 256             | Ailao Shan                             |
|                  |                              |                              |                  |                  | 10.00           | 164             |                                        |
| 4 (m)            |                              |                              | 0.44             | 158              | 0.57            | 294             | Ailao Shan                             |
|                  |                              |                              |                  |                  | 2.50            | 302             |                                        |
| 5 (u)            | 0.49                         | 20                           | 0.24             | 86               | 1.40            | 164             | Yunnan Plateau                         |
|                  |                              |                              |                  |                  | 2.80            | 201             |                                        |
| 6 (u)            | 0.38                         | 66                           |                  |                  | 2.30            | 453             | Ailao Shan                             |
| 7                |                              |                              | 0.38             | 95               | 3.00            | 302             | Yunnan Plateau                         |
| 8 (m)            |                              |                              | 0.40             | 125              |                 |                 | Ailao Shan                             |
| 9 (u)            | 0.21                         | 29                           | 0.63             | 203              |                 |                 | Yunnan Plateau                         |
| 10 (m)           |                              |                              | 0.50             | 139              | 1.20            | 213             | Ailao Shan                             |
|                  |                              |                              |                  |                  | 1.70            | 301             |                                        |
|                  |                              |                              |                  |                  | 1.40            | 293             |                                        |
| 11               |                              |                              | 0.62             | 72               | 7.20            | 656             | Yunnan Plateau                         |
|                  |                              |                              | 0.88             | 160              |                 |                 |                                        |
| 12 (m)           |                              |                              | 0.45             | 131              | 0.57            | 246             | Ailao Shan                             |
| 13               |                              |                              |                  |                  | 0.52            | 145             | YP equilibrated                        |
| 14               |                              |                              | 1.30             | 137              | 1.90            | 389             | Yunnan Plateau                         |
|                  |                              |                              |                  |                  | 1.60            | 201             |                                        |
| 15 (u,m)         | 0.30                         | 36                           | 0.84             | 140              | 6.40            | 288             | Ailao Shan                             |
|                  |                              |                              |                  |                  | 2.10            | 293             |                                        |
| 16               |                              |                              | 0.23             | 26               | 4.50            | 145             | Yunnan Plateau                         |
|                  |                              |                              | 0.73             | 93               | 7.90            | 313             |                                        |
| 17 (m)           |                              |                              | 0.40             | 139              |                 |                 | Ailao Shan                             |
| 18               |                              |                              | 1.50             | 90               | 4.50            | 143             | Yunnan Plateau                         |
|                  |                              |                              |                  |                  | 3.20            | 515             |                                        |
| 19               |                              |                              | 0.50             | 45               | 11.00           | 534             | Yunnan Plateau                         |
|                  |                              |                              | 1.00             | 164              |                 |                 |                                        |
| 20               |                              |                              | 0.23             | 129              | 4.50            | 341             | Ailao Shan                             |
| 21 (u,m)         | 0.45                         | 24                           |                  |                  | 4.30            | 453             | Yunnan Plateau                         |
| 22               |                              |                              |                  |                  | 0.32            | 161             | AS equilibrated                        |
| 23               |                              |                              | 0.72             | 74               | 6.30            | 687             | Yunnan Plateau                         |
|                  |                              |                              | 1.40             | 141              |                 |                 |                                        |
| 26               |                              |                              | 0.90             | 103              | 0.42            | 243             | Ailao Shan                             |
| 27 (u,m)         | 0.22                         | 56                           | 0.29             | 163              | 0.84            | 246             | AS equilibrated                        |
|                  |                              |                              |                  |                  | 2.20            | 241             |                                        |
| 28               |                              |                              | 0.55             | 19               | 8.30            | 514             | Yunnan Plateau                         |
|                  |                              |                              | 0.74             | 97               |                 |                 |                                        |
| 29 (u,m)         | 0.43                         | 31                           | 1.20             | 80               | 3.30            | 106             | Yunnan Plateau                         |
|                  |                              |                              |                  |                  | 3.80            | 465             |                                        |
| 30               |                              |                              | 0.26             | 67               | 1.50            | 318             | AS equilibrated                        |
|                  |                              |                              | 0.63             | 172              | 3.00            | 373             |                                        |
| 31               |                              |                              | 0.37             | 61               | 2.60            | 252             | Yunnan Plateau                         |
|                  |                              |                              | 0.18             | 161              |                 |                 |                                        |
| 32               |                              |                              |                  |                  | 0.73            | 213             | AS equilibrated                        |

|          |      |    |      |     |       |     |                 |
|----------|------|----|------|-----|-------|-----|-----------------|
| 33       |      |    | 0.20 | 46  | 0.18  | 183 | Yunnan Plateau  |
|          |      |    | 1.00 | 175 |       |     |                 |
| 34       |      |    | 0.34 | 124 | 5.70  | 186 | Ailao Shan      |
|          |      |    | 0.40 | 275 |       |     |                 |
| 35 (m)   |      |    | 0.39 | 118 | 1.50  | 205 | Yunnan Plateau  |
| 36       |      |    | 0.40 | 106 | 2.10  | 179 | Ailao Shan      |
|          |      |    | 1.00 | 147 |       |     |                 |
| 37 (u,m) | 0.17 | 41 | 1.00 | 99  | 2.20  | 309 | Yunnan Plateau  |
|          |      |    |      |     | 10.00 | 297 |                 |
| 38       |      |    | 0.72 | 63  | 3.50  | 414 | Yunnan Plateau  |
|          |      |    | 1.30 | 71  |       |     |                 |
| 39 (m)   |      |    | 0.32 | 51  | 0.93  | 312 | Ailao Shan      |
| 40       |      |    | 1.20 | 80  | 2.70  | 479 | Yunnan Plateau  |
|          |      |    | 0.40 | 90  |       |     |                 |
| 41 (u,m) | 0.43 | 23 | 1.00 | 107 | 3.00  | 438 | Ailao Shan      |
| 42 (m)   |      |    | 1.50 | 141 | 8.90  | 667 | Yunnan Plateau  |
| 43       |      |    | 0.44 | 59  | 2.30  | 325 | Ailao Shan      |
|          |      |    | 1.20 | 187 |       |     |                 |
| 44       |      |    | 0.53 | 85  | 0.37  | 102 | Yunnan Plateau  |
| 45       |      |    | 0.47 | 52  | 4.30  | 375 | Ailao Shan      |
|          |      |    | 0.41 | 132 |       |     |                 |
| 46 (u)   | 0.27 | 18 | 0.39 | 107 | 2.70  | 334 | Ailao Shan      |
| 47       |      |    | 0.32 | 59  |       |     | Yunnan Plateau  |
|          |      |    | 0.62 | 86  |       |     |                 |
| 48 (m)   |      |    | 0.70 | 64  | 4.00  | 277 | Ailao Shan      |
| 49       |      |    |      |     | 1.70  | 160 | Ailao Shan      |
| 50       |      |    |      |     | 0.45  | 149 | NE equilibrated |
| 51       |      |    | 0.18 | 98  | 1.80  | 123 | Ailao Shan      |
|          |      |    | 0.36 | 244 |       |     |                 |
| 52       |      |    |      |     | 0.63  | 190 | NE equilibrated |
| 53       |      |    |      |     | 0.57  | 102 | AS equilibrated |
| 54       |      |    | 0.53 | 50  | 23.00 | 305 | AS              |
|          |      |    | 0.23 | 144 |       |     |                 |
| 55 (m)   |      |    | 0.35 | 94  | 2.00  | 234 | AS              |
| 56       |      |    |      |     | 0.51  | 163 | YP equilibrated |
| 57       |      |    |      |     | 0.48  | 142 | YP equilibrated |
| 58 (u)   | 0.07 | 21 |      |     | 1.40  | 473 | AS two segment  |
| 59       |      |    |      |     | 0.40  | 95  | YP equilibrated |
| 60 (u)   | 0.50 | 15 | 0.92 | 247 | 6.40  | 417 | Ailao Shan      |
| 61 (m)   |      |    | 0.74 | 66  | 3.30  | 271 | Ailao Shan      |
|          |      |    |      |     | 3.20  | 326 |                 |
| 62       |      |    |      |     | 0.52  | 111 | YP equilibrated |
| 63       |      |    |      |     | 0.59  | 146 | YP equilibrated |
| 64 (u,m) | 0.56 | 26 | 1.10 | 125 | 4.30  | 496 | Ailao Shan      |

|          |      |    |      |     |      |     |                 |
|----------|------|----|------|-----|------|-----|-----------------|
| 65 (u,m) | 0.91 | 45 | 0.80 | 70  | 5.20 | 608 | Ailao Shan      |
| 66 (u,m) | 0.30 | 32 | 0.30 | 93  | 0.97 | 169 | Yunnan Plateau  |
| 67       |      |    |      |     | 0.67 | 243 | AS equilibrated |
| 68 (m)   |      |    | 0.70 | 90  | 1.80 | 159 | Yunnan Plateau  |
| 69 (u)   | 0.30 | 46 | 0.52 | 101 | 4.20 | 457 | Ailao Shan      |
| 70 (m)   |      |    | 0.50 | 86  |      |     | Yunnan Plateau  |
| 71       |      |    | 0.46 | 68  | 5.50 | 593 | Ailao Shan      |
| 72       |      |    | 0.25 | 135 |      |     |                 |
| 72       |      |    | 0.39 | 56  | 3.00 | 482 | Ailao Shan      |
| 73       |      |    | 1.50 | 249 |      |     |                 |
| 73       |      |    | 0.69 | 71  | 5.60 | 362 | Yunnan Plateau  |
| 74 (u)   | 0.55 | 64 | 0.19 | 130 |      |     |                 |
| 74 (u)   |      |    | 0.69 | 262 | 4.20 | 357 | Ailao Shan      |
| 75       |      |    | 0.59 | 36  |      |     | Yunnan Plateau  |
| 76 (u,m) | 0.28 | 29 | 0.46 | 67  | 2.20 | 214 | Yunnan Plateau  |
| 77       |      |    |      |     | 5.60 | 253 |                 |
| 77       |      |    | 0.51 | 41  |      |     | Yunnan Plateau  |
| 78 (u)   | 0.37 | 38 |      |     | 1.70 | 459 | AS two segment  |
| 79 (u)   | 0.23 | 54 | 0.90 | 180 | 1.20 | 203 | Yunnan Plateau  |
| 80 (u,m) | 0.27 | 31 | 0.64 | 103 | 6.60 | 190 |                 |
| 81 (m)   |      |    |      |     | 1.00 | 160 | Yunnan Plateau  |
| 81 (m)   |      |    | 0.60 | 117 | 1.30 | 212 |                 |
| 82 (u)   | 0.38 | 40 |      |     | 1.20 | 179 | Yunnan Plateau  |
| 83 (u,m) | 0.19 | 7  |      |     |      |     | Ailao Shan      |
| 83 (u,m) |      |    | 0.44 | 73  | 1.10 | 411 | Ailao Shan      |
| 84 (u,m) | 0.47 | 24 | 0.86 | 60  | 1.60 | 300 | Ailao Shan      |
| 85       |      |    |      |     | 5.40 | 682 |                 |
| 85       |      |    | 0.44 | 83  | 2.10 | 266 | Yunnan Plateau  |
| 86       |      |    | 0.82 | 131 |      |     |                 |
| 86       |      |    | 0.28 | 44  | 6.60 | 535 | Ailao Shan      |
| 87 (u)   | 0.80 | 57 | 1.30 | 95  |      |     |                 |
| 87 (u)   |      |    | 0.86 | 175 |      |     |                 |
| 88 (u)   | 0.31 | 24 | 0.72 | 85  | 2.60 | 409 | Yunnan Plateau  |
| 88 (u)   |      |    | 0.40 | 131 |      |     |                 |
| 92       |      |    |      |     | 0.73 | 281 | AS two segment  |
| 93       |      |    |      |     | 0.26 | 144 | YP equilibrated |
| 93       |      |    | 0.10 | 66  | 0.15 | 205 | Yunnan Plateau  |
| 94       |      |    |      |     | 0.31 | 208 | Ailao Shan      |
| 95       |      |    | 0.97 | 66  |      |     | Yunnan Plateau  |
| 96       |      |    |      |     | 0.72 | 105 | YP equilibrated |
| 100      |      |    | 0.30 | 160 | 0.84 | 186 | Ailao Shan      |
| 101 (u)  | 0.29 | 63 | 0.62 | 141 | 1.40 | 150 | Yunnan Plateau  |
|          |      |    |      |     | 1.40 | 167 |                 |

|     |      |     |      |     |                 |
|-----|------|-----|------|-----|-----------------|
| 106 | 0.36 | 25  | 2.00 | 156 | Ailao Shan      |
| 108 | 0.62 | 43  | 1.50 | 265 | Ailao Shan      |
| 109 | 0.67 | 90  |      |     | Ailao Shan      |
|     | 2.20 | 103 |      |     |                 |
| 112 |      |     | 0.35 | 71  | AS equilibrated |

---

*Note:* See Figure DR1 for channel locations and Figure DR2 for tributary morphology. Tributaries for which upper segments are projected are marked with a u, and for which middle segments are projected are marked with an m. Projection data given in DR Table 2 and Figure DR3.

<sup>†</sup>Concavity determined by linear regression to selected slope-area data using a 20 m contour interval.

<sup>‡</sup>Normalized steepness index determined by linear regression to slope-area data but with a fixed concavity of 0.45.

<sup>§</sup> Channels to the southwest of the Red River are designated as “Ailao Shan” and channels to the northeast are “Yunnan Plateau.” Fully equilibrated channels (no internal knickpoints or segmentation) from the southwest are labeled “AS equilibrated” and from the northeast are “YP equilibrated.” Channels with a two segment morphology (upper and lower channels only) all four within the Ailao Shan, are labeled “AS two segment.”

---



TABLE DR2. PROJECTED CHANNEL SEGMENT VALUES AND RIVER INCISION

| Trib. number | River elev (m) | Upper proj. elev (m) <sup>†</sup> | Middle proj. elev (m) <sup>‡</sup> | Total incision (m) | 1 <sup>st</sup> stage incision (m) | 2 <sup>nd</sup> stage incision (m) | Incision ratio 2 <sup>nd</sup> :1 <sup>st</sup> stage | Channel location |
|--------------|----------------|-----------------------------------|------------------------------------|--------------------|------------------------------------|------------------------------------|-------------------------------------------------------|------------------|
| 1            | 91             | 1234 ± 732                        | 631 ± 446                          | 1143 ± 732         | 603 ± 857                          | 540 ± 446                          | 0.90 ± 0.74                                           | Yunnan Plateau   |
| 5            | 110            | 1407 ± 299                        |                                    | 1297 ± 299         |                                    |                                    |                                                       | Yunnan Plateau   |
| 6            | 108            | 1485 ± 201                        |                                    | 1377 ± 201         |                                    |                                    |                                                       | Ailao Shan       |
| 9            | 172            | 1499 ± 228                        |                                    | 1327 ± 228         |                                    |                                    |                                                       | Yunnan Plateau   |
| 15           | 146            | 1662 ± 240                        | 780 ± 421                          | 1516 ± 240         | 882 ± 485                          | 634 ± 421                          | 0.72 ± 0.48                                           | Ailao Shan       |
| 21           | 183            | 1652 ± 239                        | 1004 ± 211                         | 1469 ± 239         | 648 ± 319                          | 821 ± 211                          | 1.27 ± 0.33                                           | Yunnan Plateau   |
| 27           | 189            | 1490 ± 348                        | 1154 ± 322                         | 1301 ± 348         | 336 ± 474                          | 965 ± 322                          | 2.87 ± 0.96                                           | Ailao Shan       |
| 29           | 207            | 1592 ± 343                        | 1142 ± 213                         | 1385 ± 343         | 450 ± 404                          | 935 ± 213                          | 2.08 ± 0.47                                           | Yunnan Plateau   |
| 37           | 232            | 1453 ± 398                        | 1126 ± 263                         | 1221 ± 398         | 327 ± 477                          | 894 ± 263                          | 2.73 ± 0.80                                           | Yunnan Plateau   |
| 41           | 301            | 1751 ± 472                        | 1061 ± 384                         | 1450 ± 472         | 690 ± 608                          | 760 ± 384                          | 1.10 ± 0.56                                           | Ailao Shan       |
| 46           | 340            | 1721 ± 340                        |                                    | 1381 ± 340         |                                    |                                    |                                                       | Ailao Shan       |
| 58           | 426            | 1876 ± 65                         |                                    | 1450 ± 65          |                                    |                                    |                                                       | Ailao Shan       |
| 60           | 432            | 2012 ± 133                        |                                    | 1580 ± 133         |                                    |                                    |                                                       | Ailao Shan       |
| 64           | 426            | 1924 ± 143                        | 1335 ± 246                         | 1498 ± 143         | 589 ± 285                          | 909 ± 246                          | 1.54 ± 0.42                                           | Ailao Shan       |
| 65           | 441            | 1770 ± 322                        | 1730 ± 141                         | 1329 ± 322         | 40 ± 352                           | 1289 ± 141                         | 32.23 ± 3.55                                          | Ailao Shan       |
| 66           | 435            | 1412 ± 355                        | 1148 ± 270                         | 977 ± 355          | 264 ± 446                          | 713 ± 270                          | 2.70 ± 1.02                                           | Yunnan Plateau   |
| 69           | 541            | 1845 ± 261                        |                                    | 1304 ± 261         |                                    |                                    |                                                       | Ailao Shan       |
| 74           | 541            | 1675 ± 679                        |                                    | 1134 ± 679         |                                    |                                    |                                                       | Ailao Shan       |
| 76           | 605            | 1394 ± 408                        | 1237 ± 130                         | 789 ± 408          | 157 ± 428                          | 632 ± 130                          | 4.03 ± 0.83                                           | Yunnan Plateau   |
| 78           | 619            | 2189 ± 267                        |                                    | 1570 ± 267         |                                    |                                    |                                                       | Ailao Shan       |
| 79           | 653            | 1459 ± 139                        |                                    | 806 ± 139          |                                    |                                    |                                                       | Yunnan Plateau   |
| 80           | 710            | 1517 ± 244                        | 1190 ± 288                         | 807 ± 244          | 327 ± 377                          | 480 ± 288                          | 1.47 ± 0.88                                           | Yunnan Plateau   |
| 82           | 752            | 2136 ± 348                        |                                    | 1384 ± 348         |                                    |                                    |                                                       | Ailao Shan       |
| 83           | 792            | 2352 ± 64                         | 1968 ± 79                          | 1560 ± 64          | 384 ± 102                          | 1176 ± 79                          | 3.06 ± 0.21                                           | Ailao Shan       |
| 84           | 806            | 2187 ± 195                        | 2053 ± 162                         | 1381 ± 195         | 134 ± 254                          | 1247 ± 162                         | 9.31 ± 1.21                                           | Ailao Shan       |
| 87           | 855            | 1496 ± 468                        |                                    | 641 ± 468          |                                    |                                    |                                                       | Yunnan Plateau   |
| 88           | 860            | 2401 ± 216                        |                                    | 1541 ± 216         |                                    |                                    |                                                       | Ailao Shan       |
| 101          | 1046           | 1629 ± 225                        |                                    | 583 ± 225          |                                    |                                    |                                                       | Yunnan Plateau   |

*Note:* Errors are 1 sigma, calculated for projections as described in data repository text and propagated through incision and incision ratio determinations. See Figure DR1 for channel locations and Figure DR3 for channel morphology.

<sup>†</sup>Elevation at projected upper channel segment at intersection with Red River.

<sup>‡</sup>Elevation of projected middle channel segment at intersection with Red River.

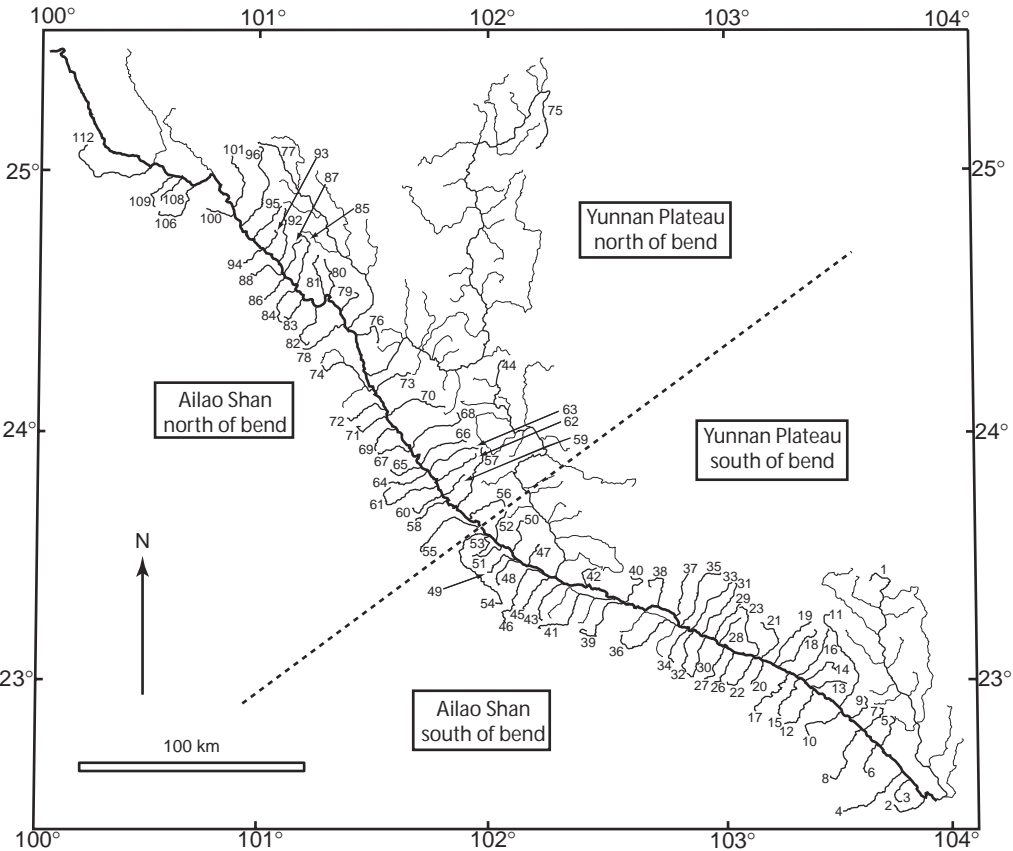

Figure DR1

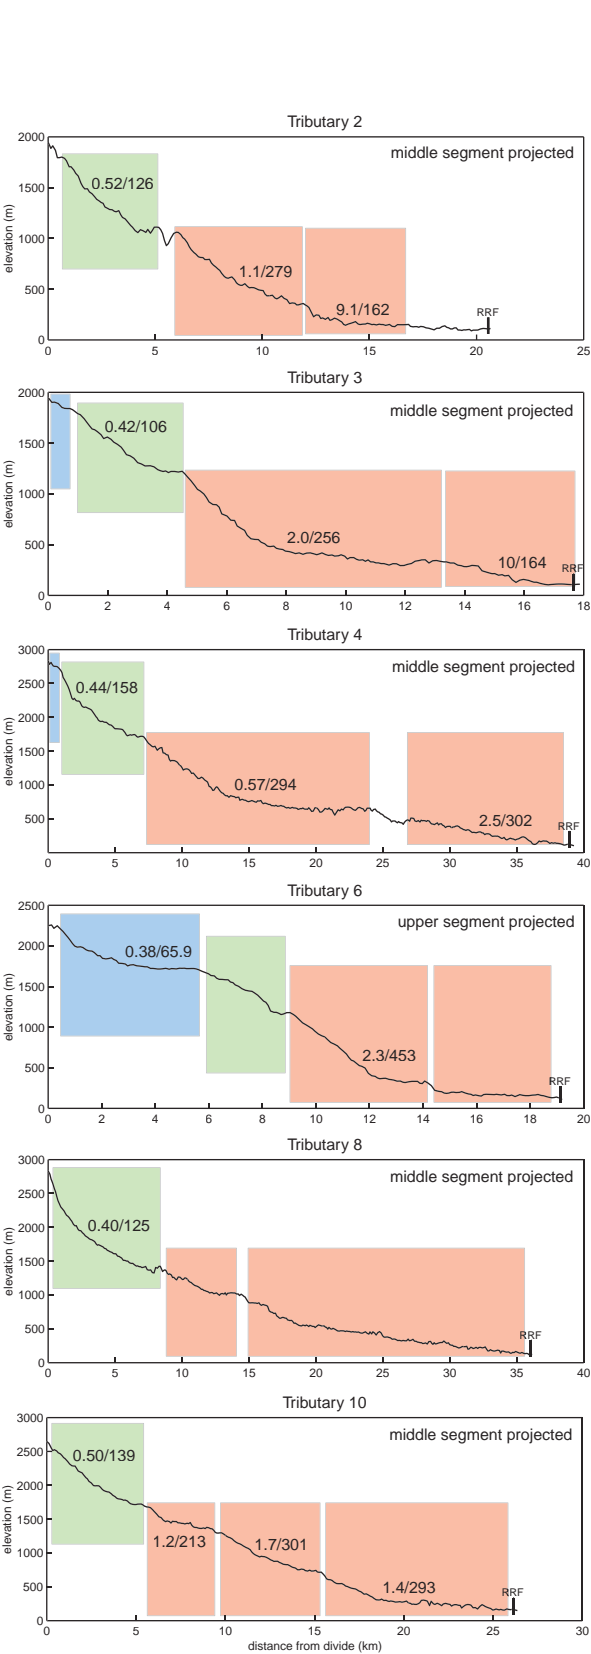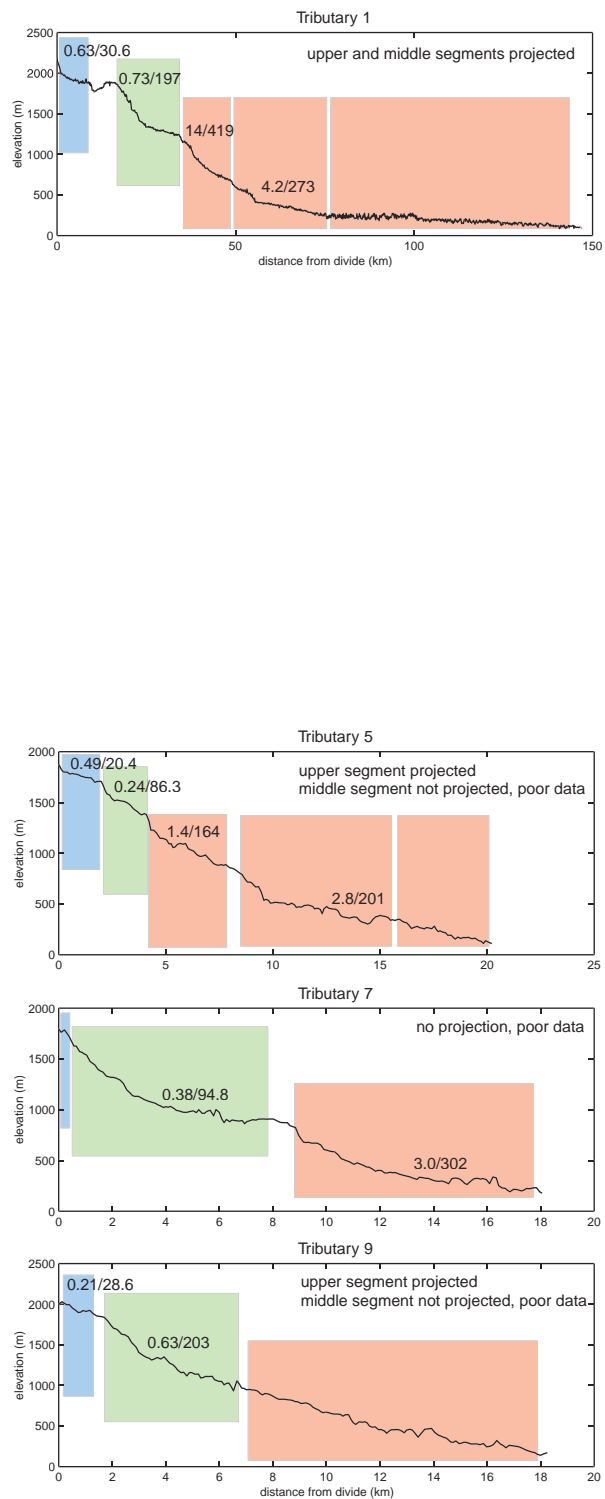

Figure DR2.1

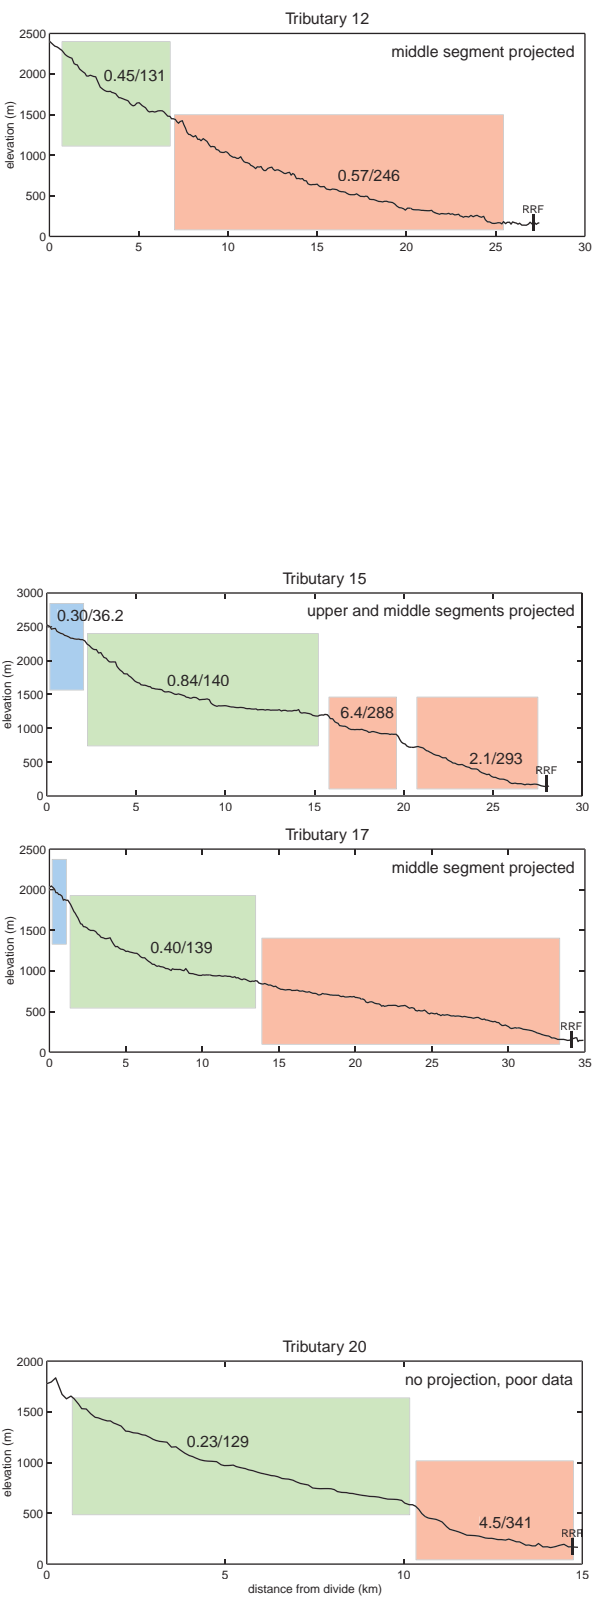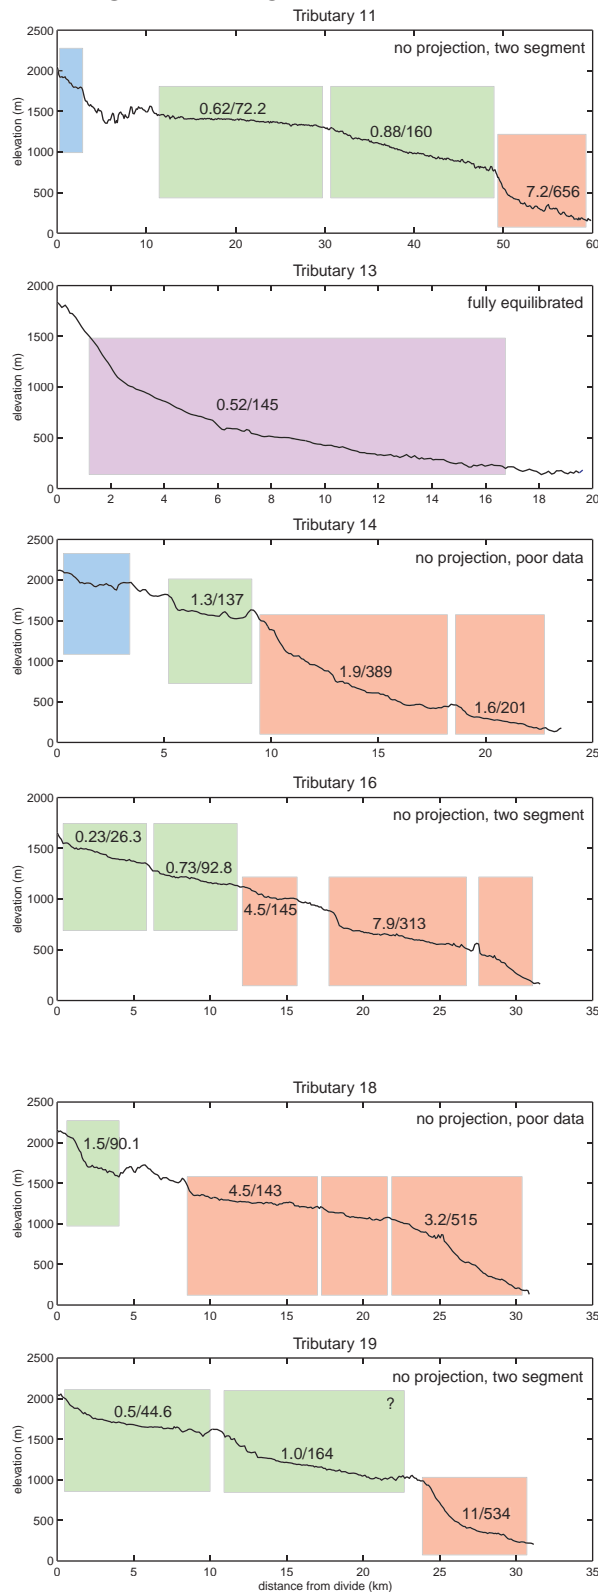

FIGURE DR2.2

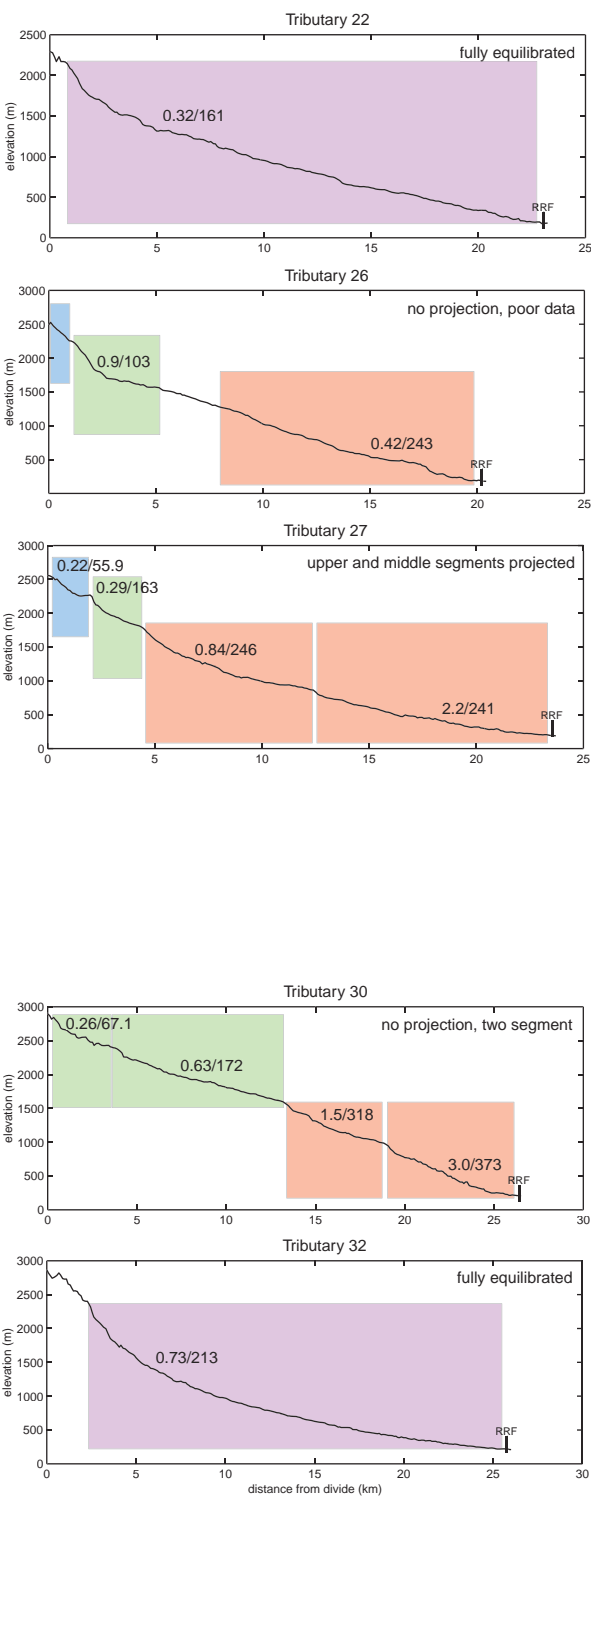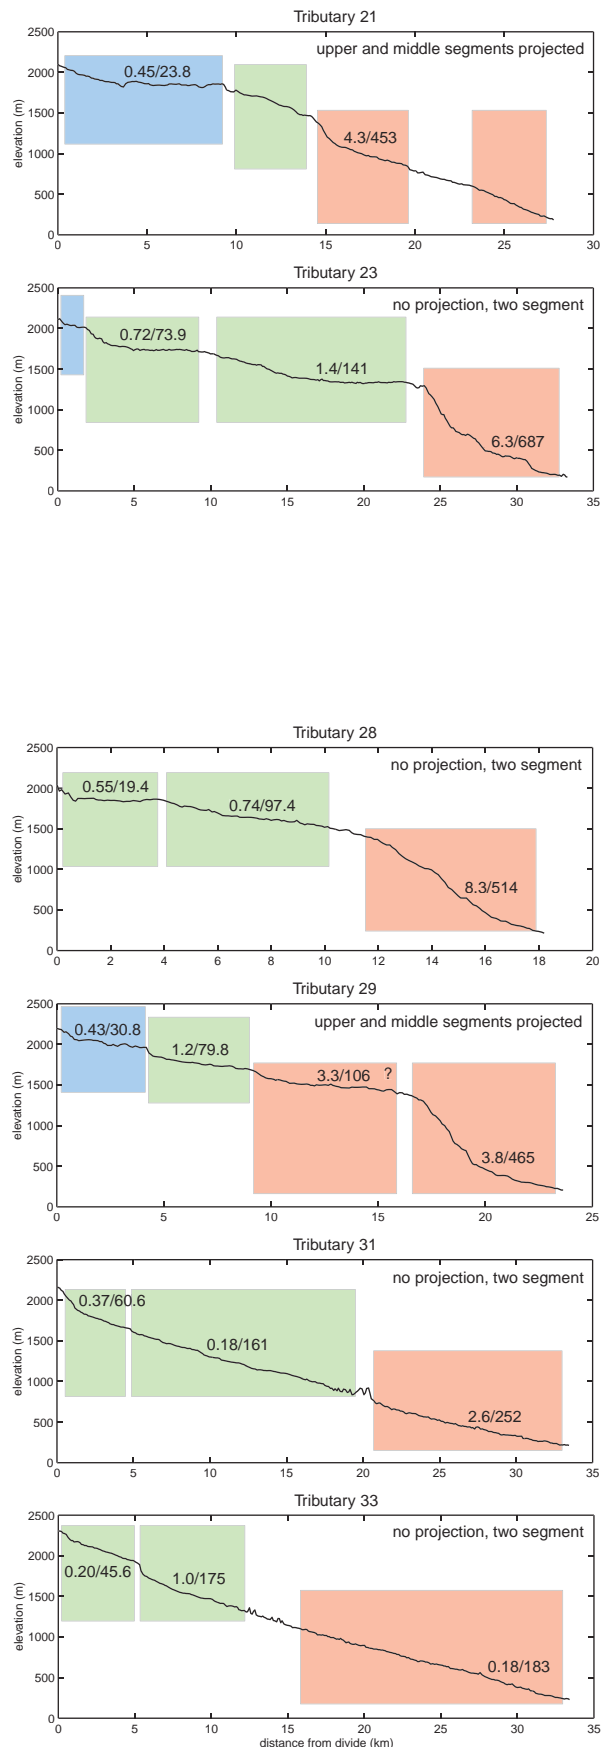

FIGURE DR2.3

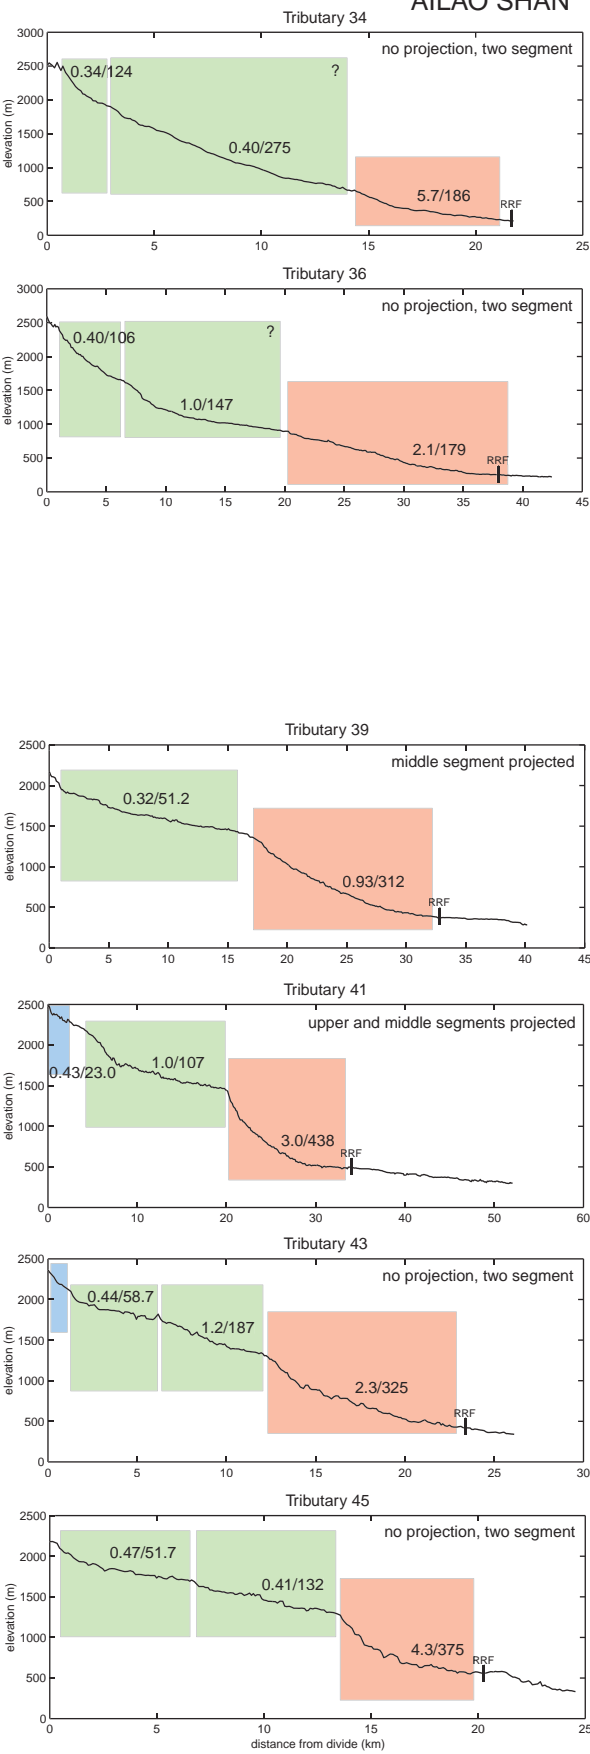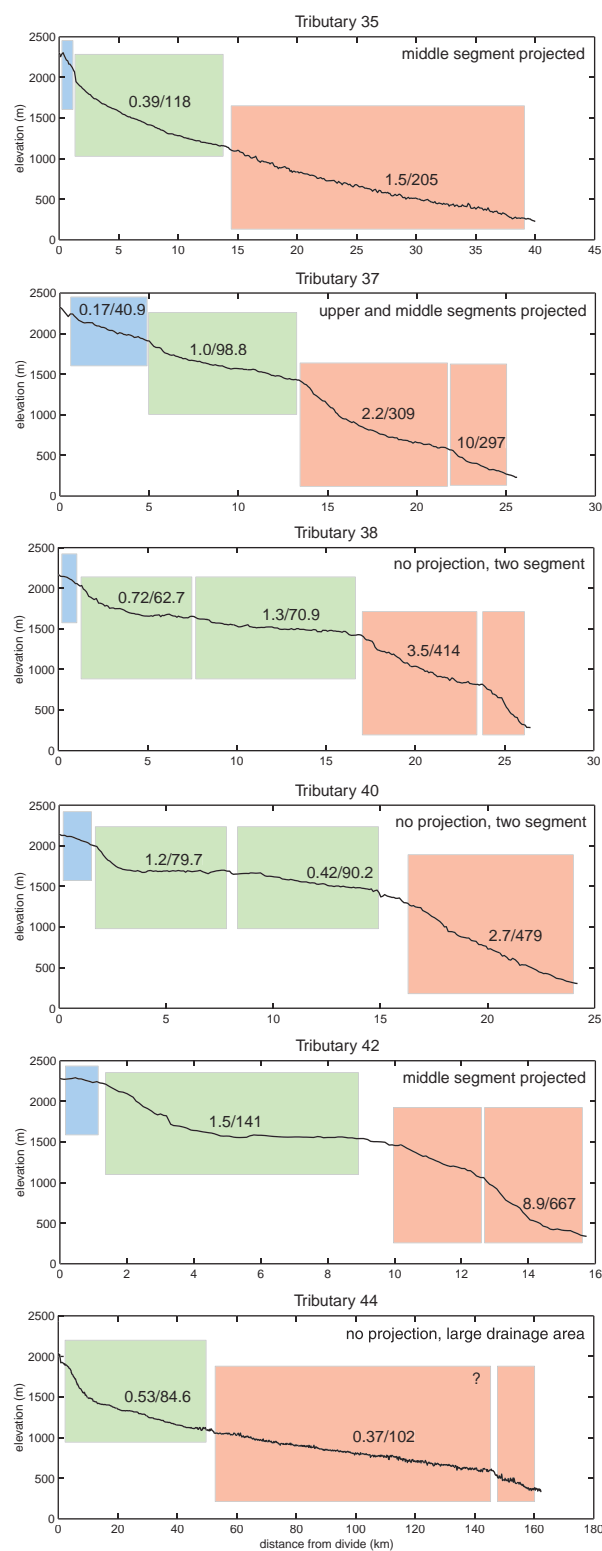

FIGURE DR2.4

# AILAO SHAN

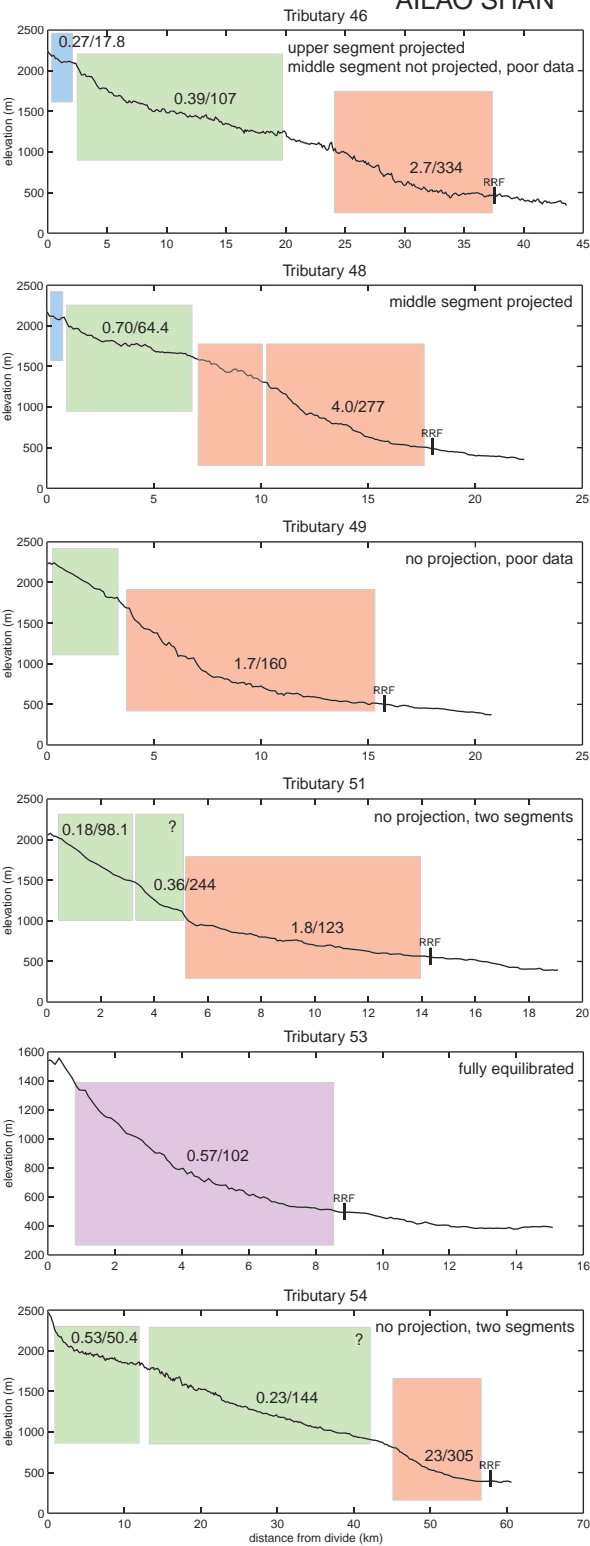

# YANGTZE PLATFORM

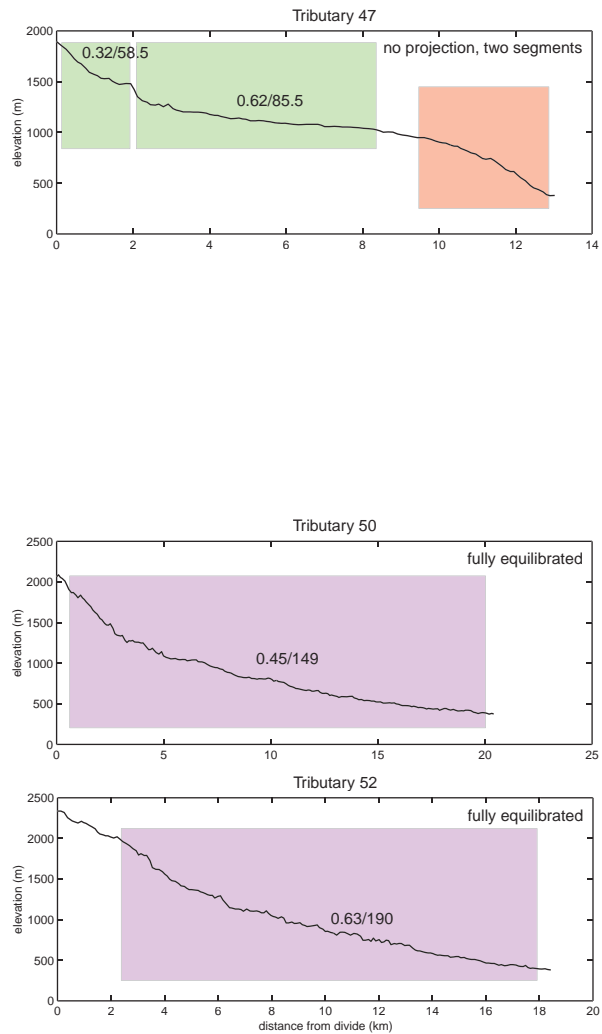

BEND

FIGURE DR2.5

# AILAO SHAN

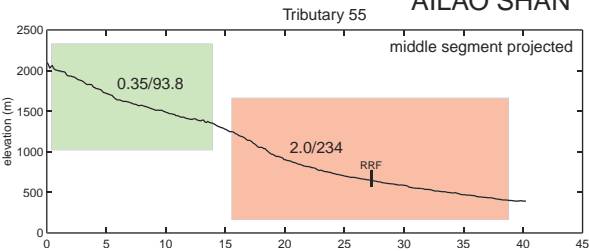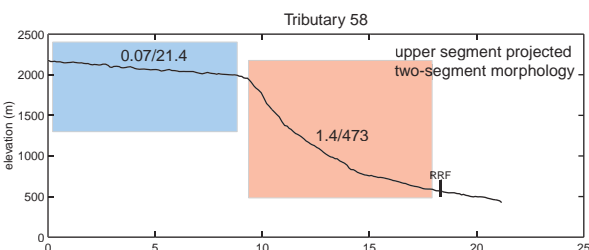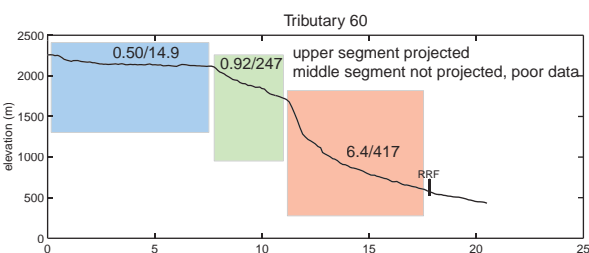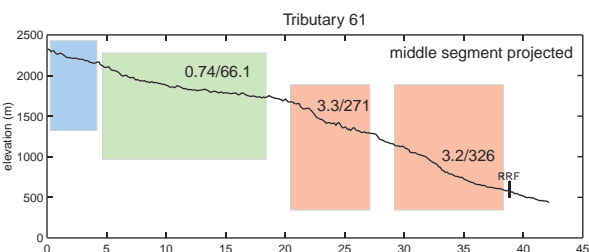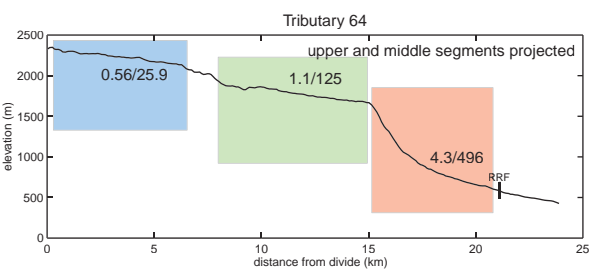

# YANGTZE PLATFORM

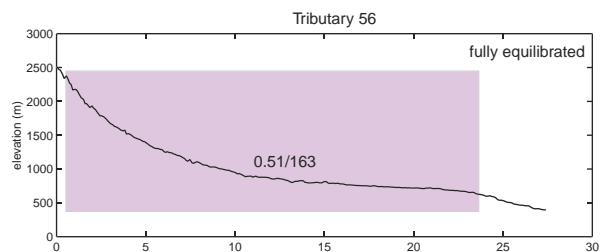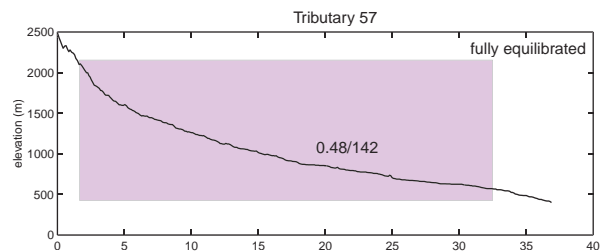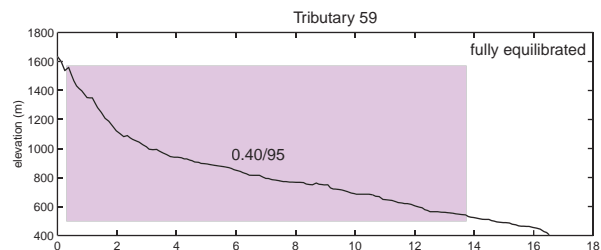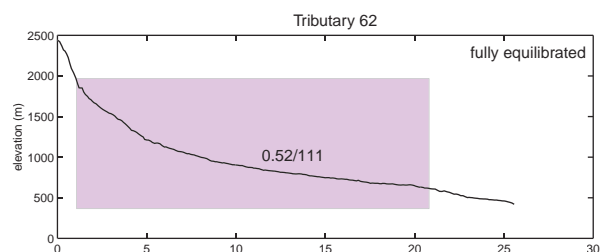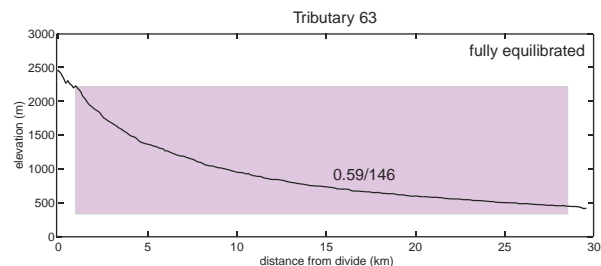

FIGURE DR2.6



# AILAO SHAN

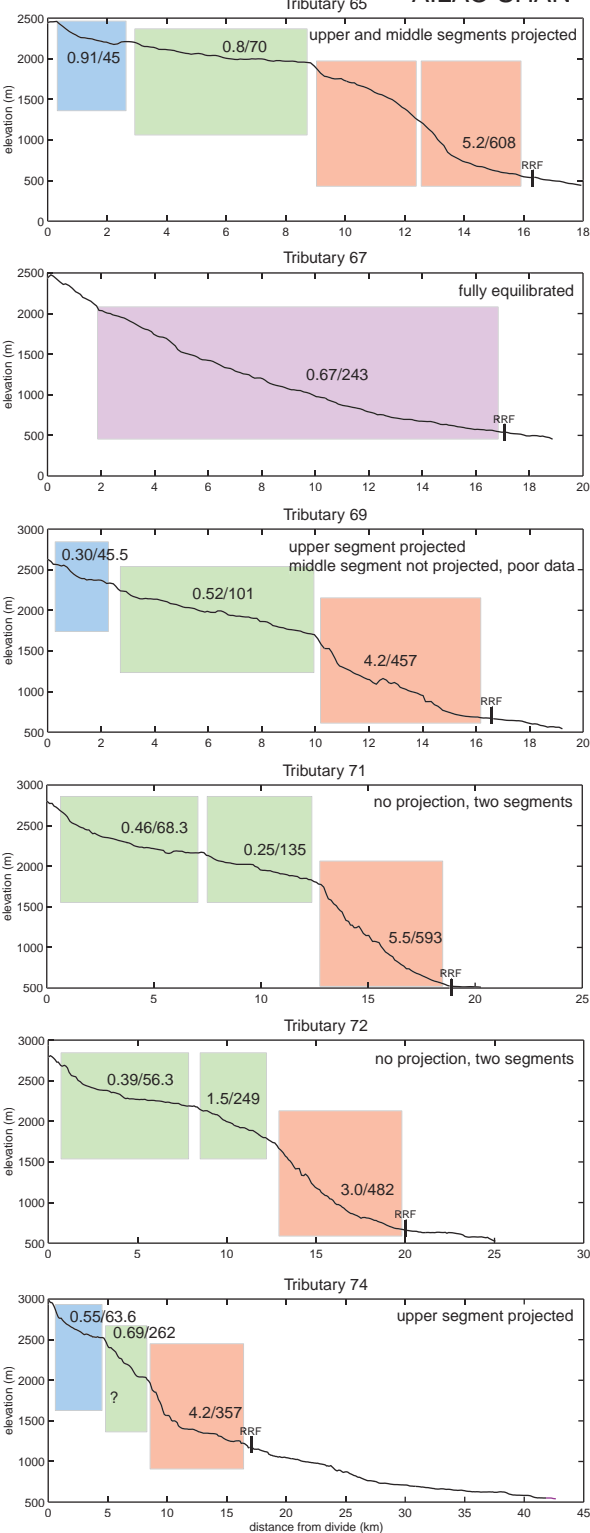

# YANGTZE PLATFORM

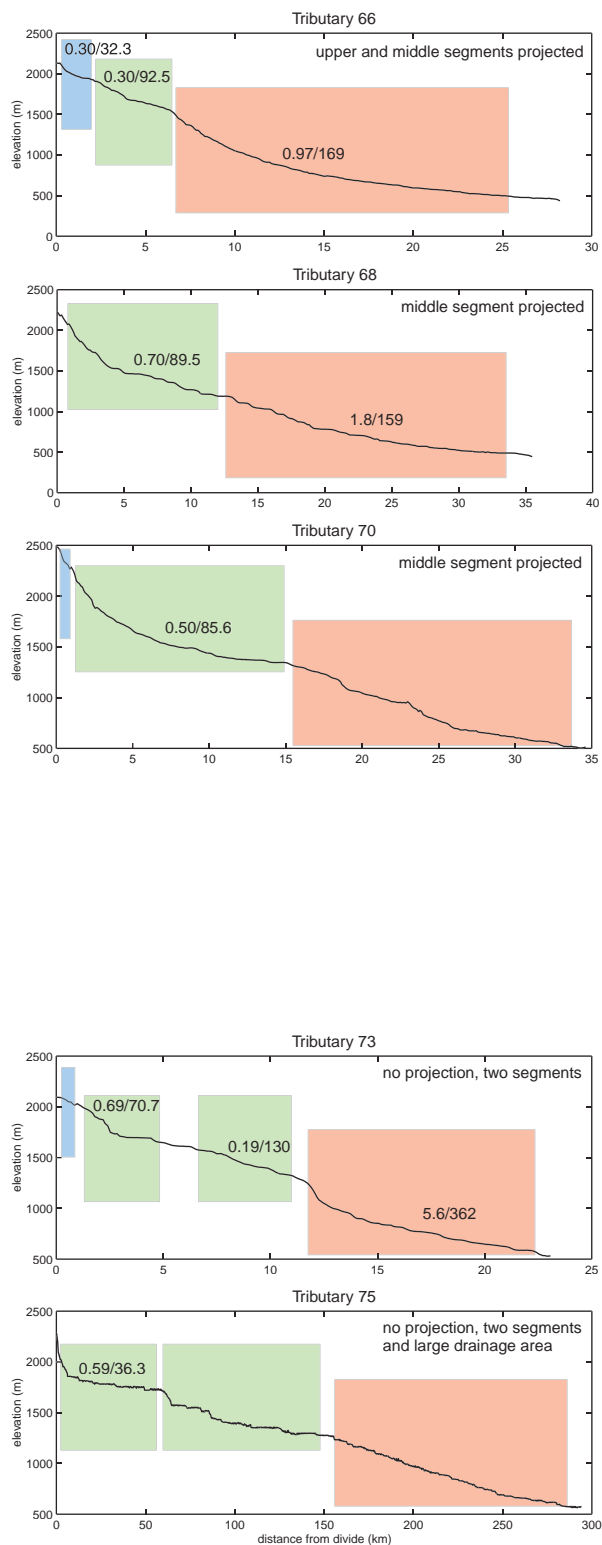

FIGURE DR2.7

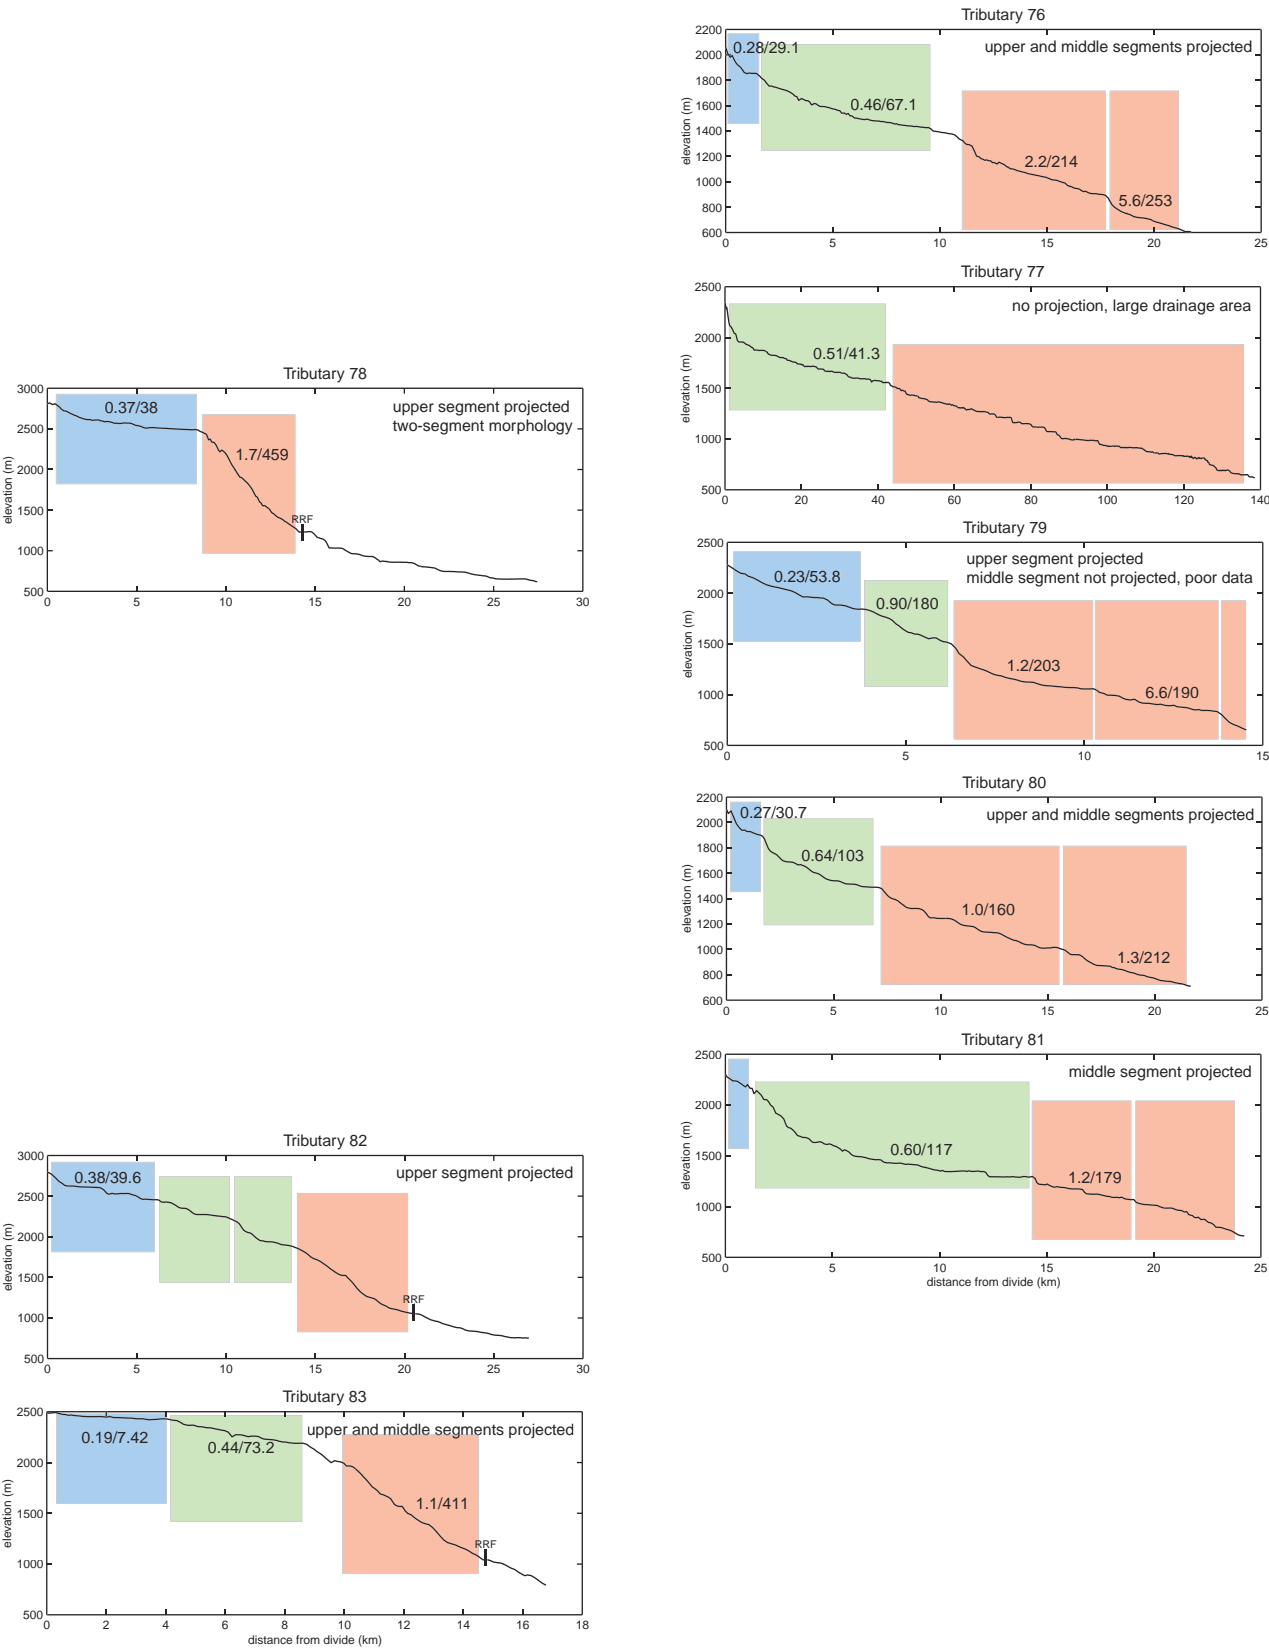

FIGURE DR 2.8

# AILAO SHAN

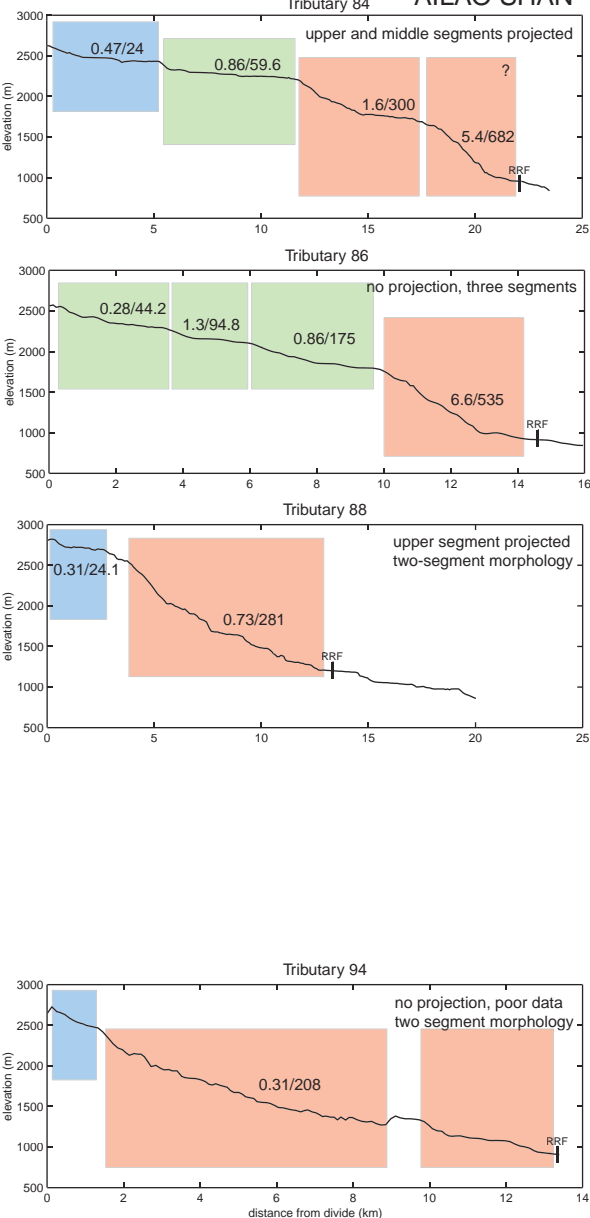

# YANGTZE PLATFORM

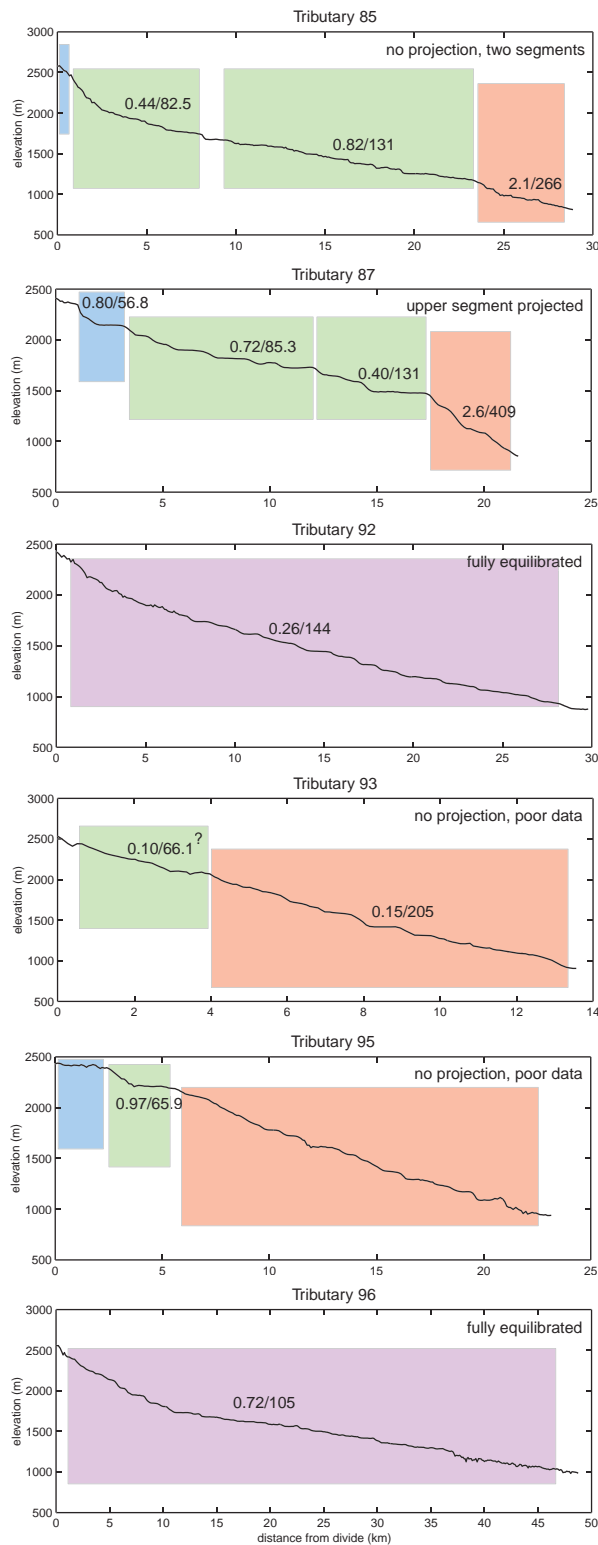

FIGURE DR2.9

# AILAO SHAN

# YANGTZE PLATFORM

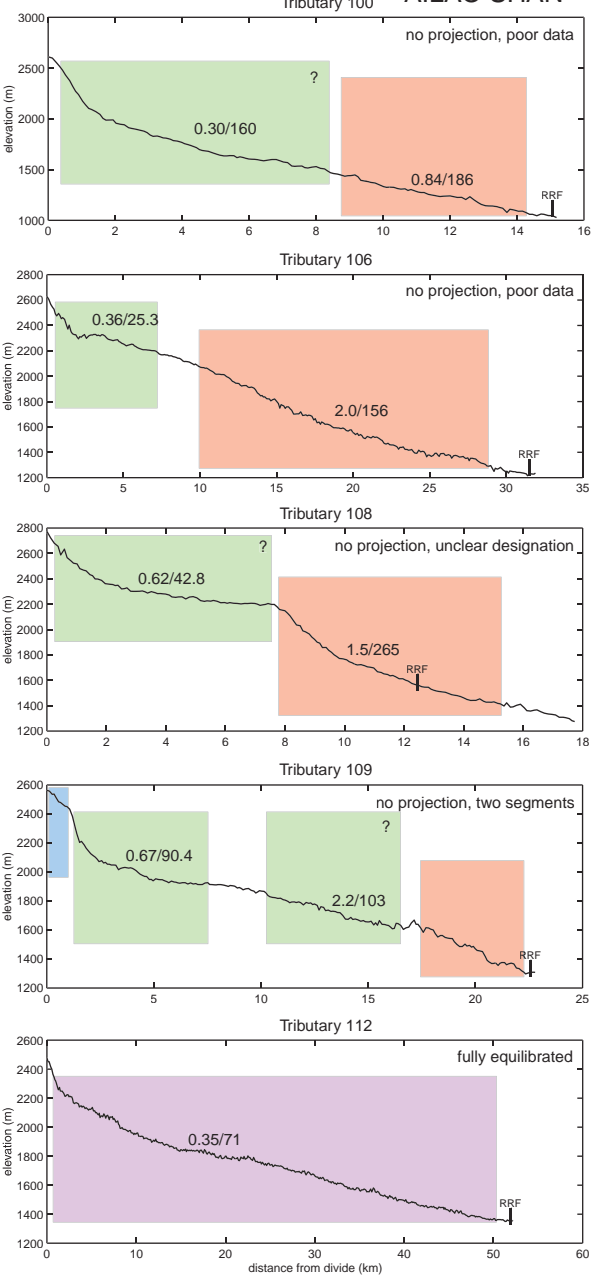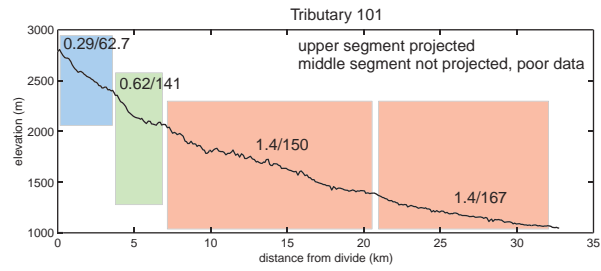

FIGURE DR2.10

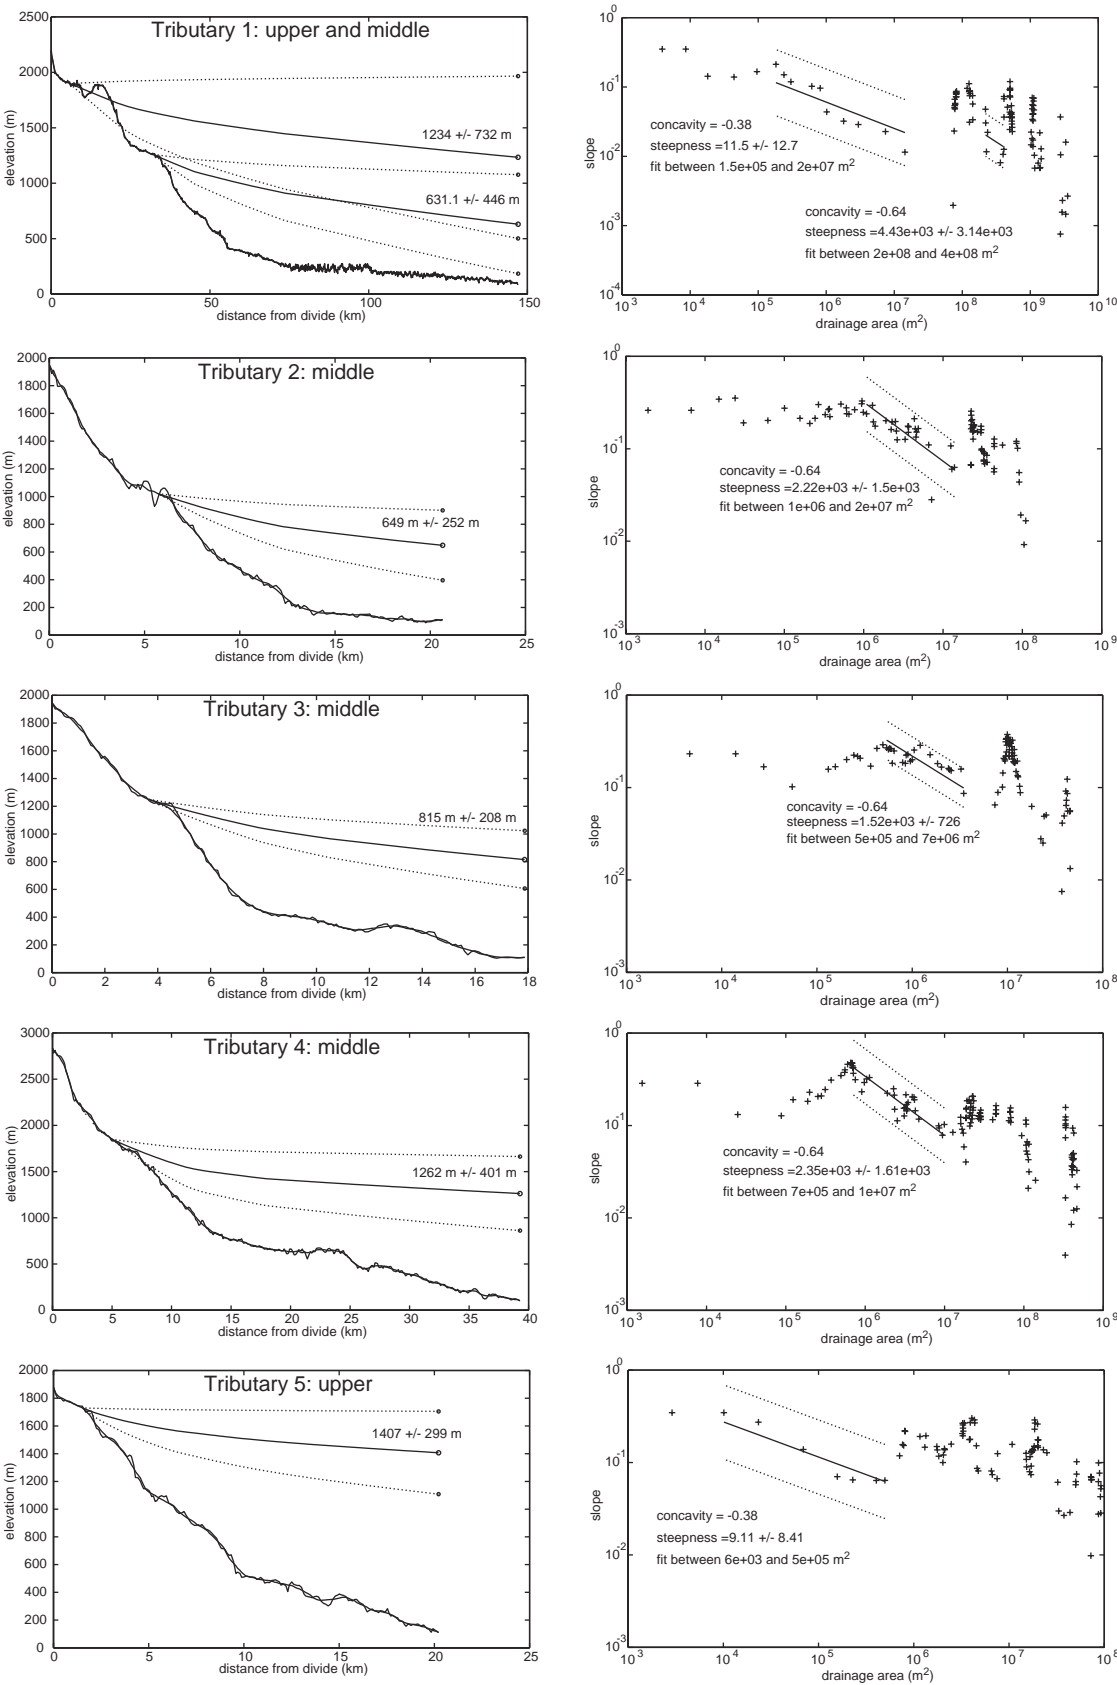

FIGURE DR3.1

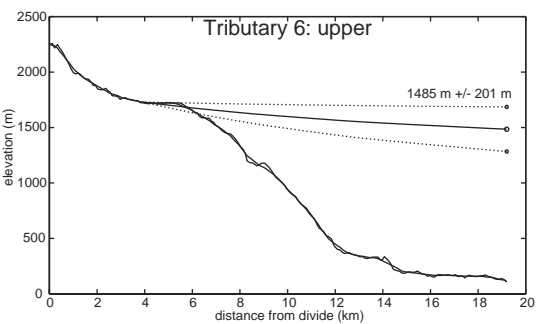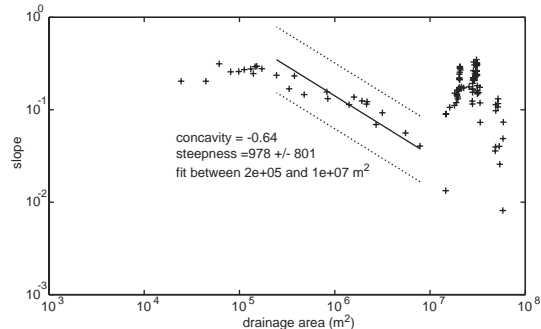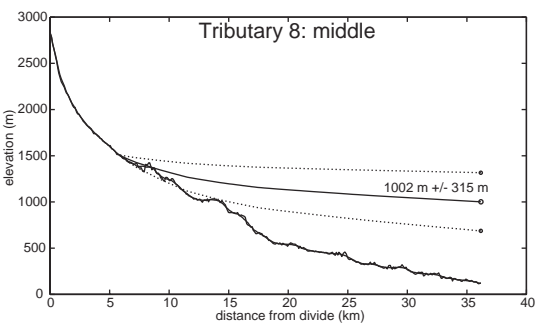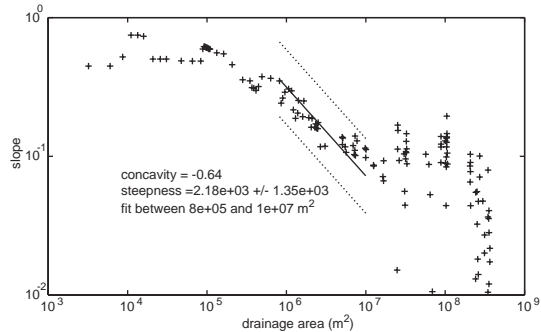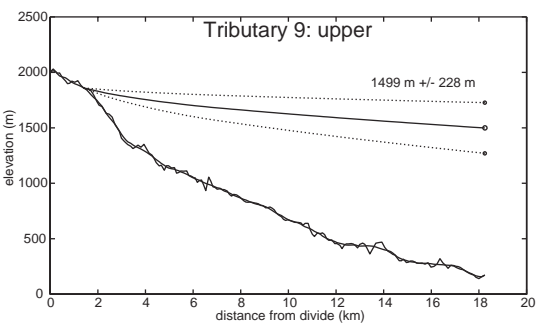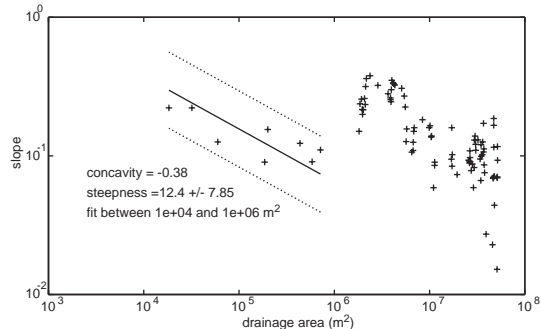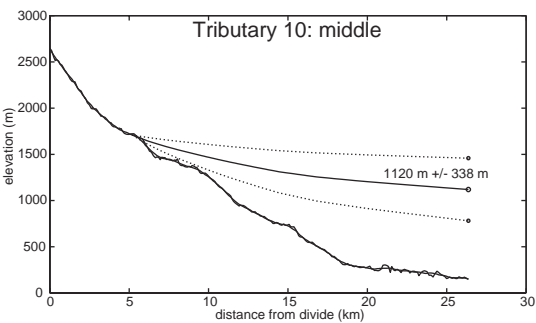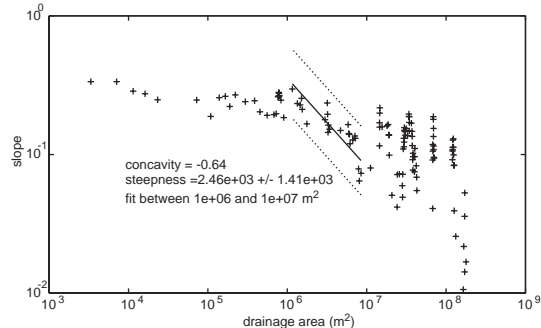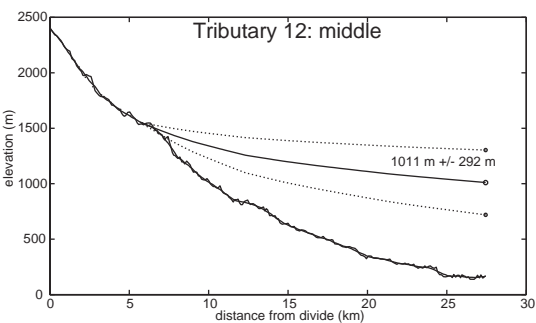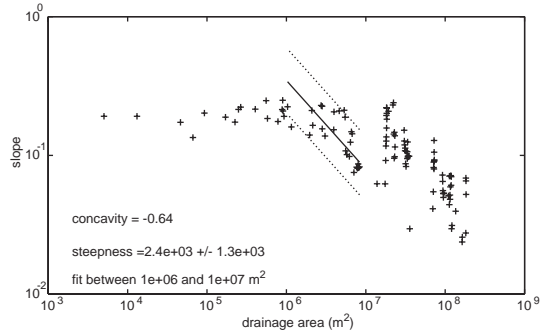

FIGURE DR3.2

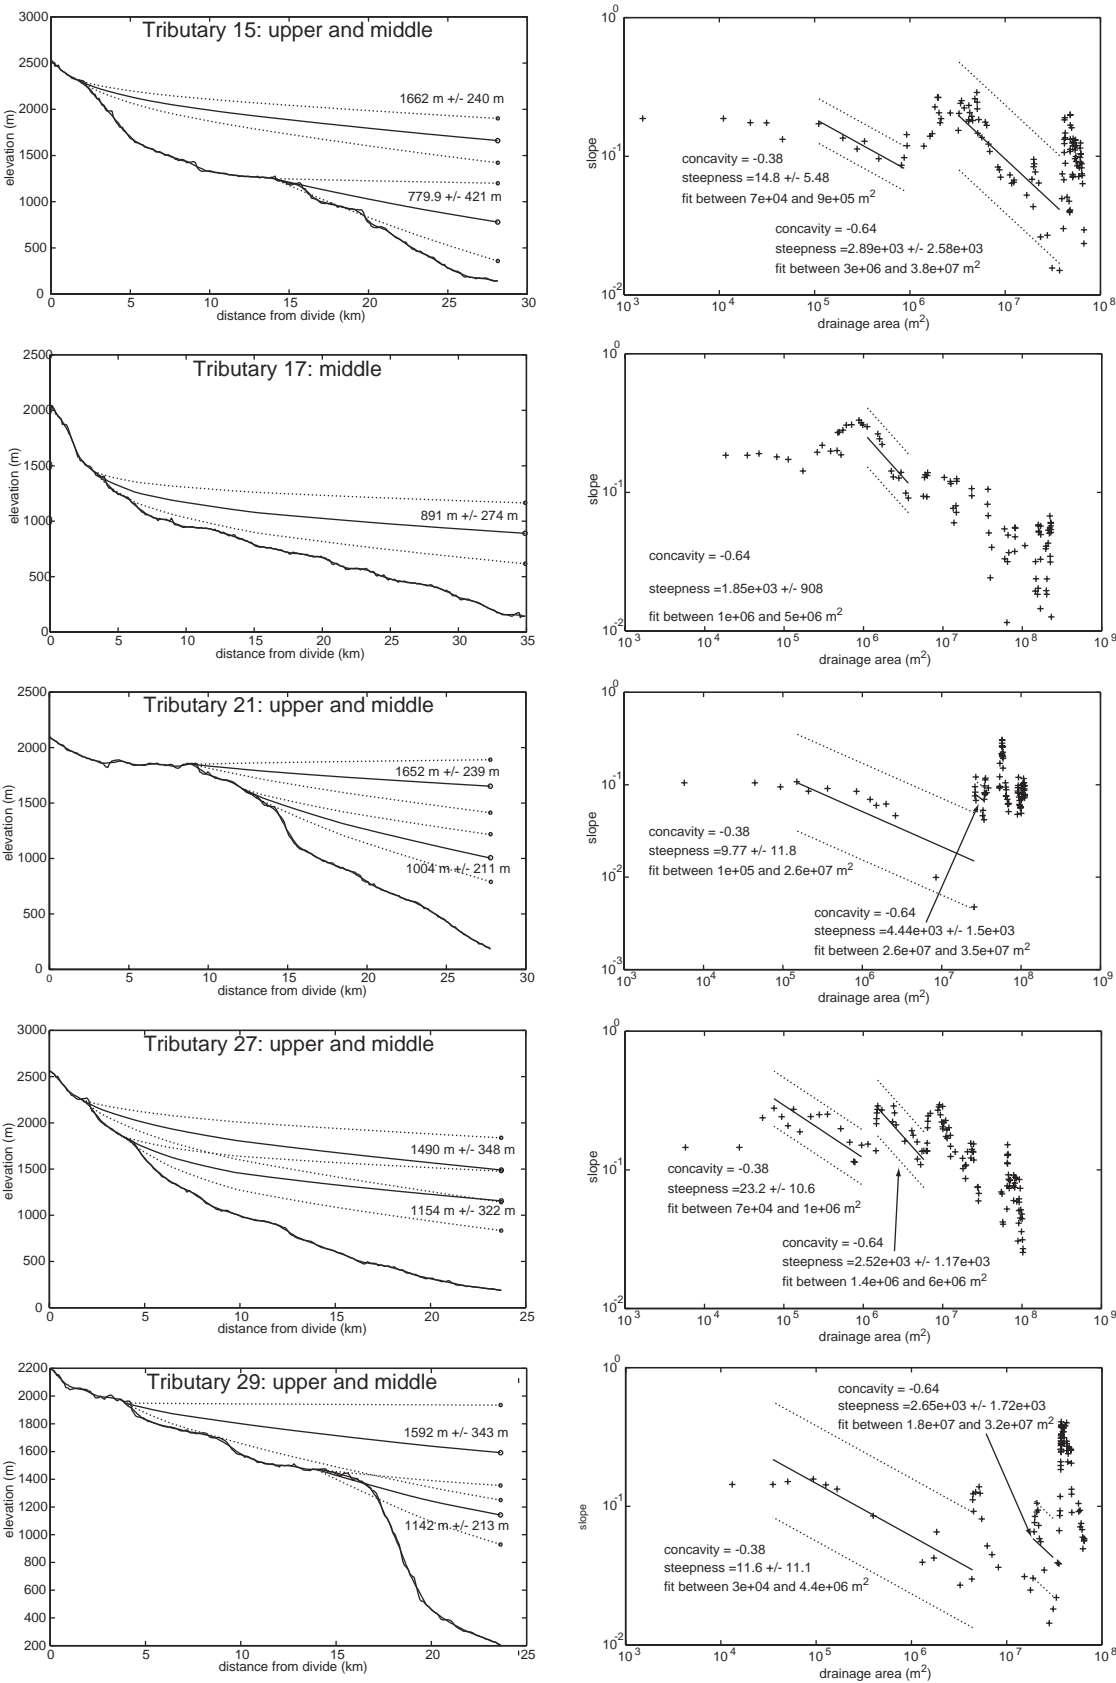

FIGURE DR3.3

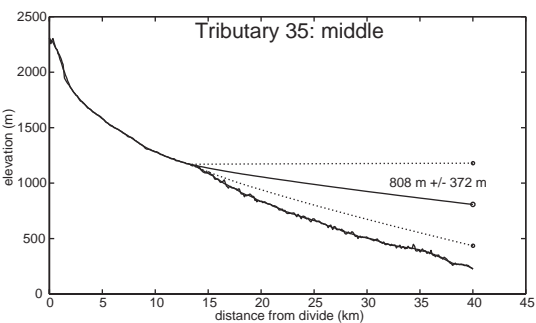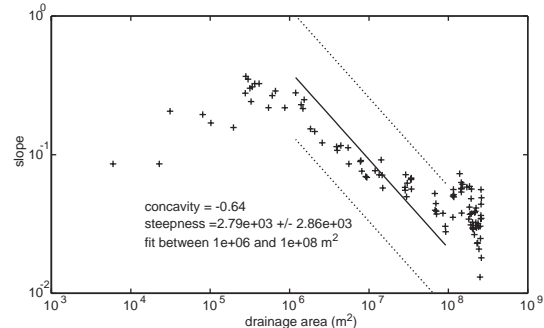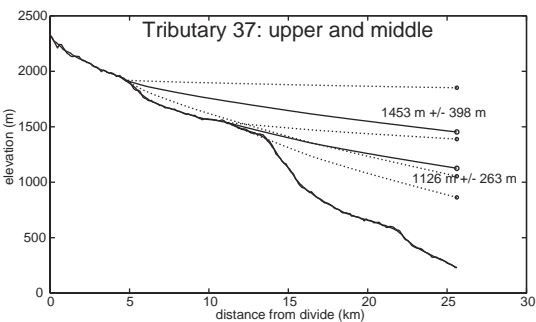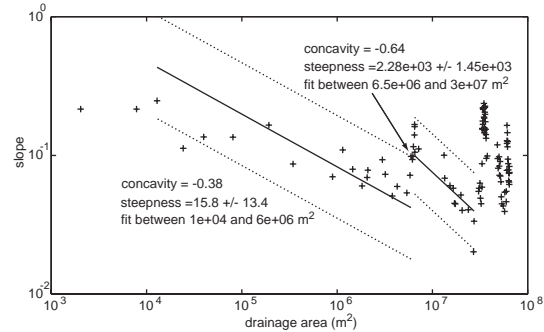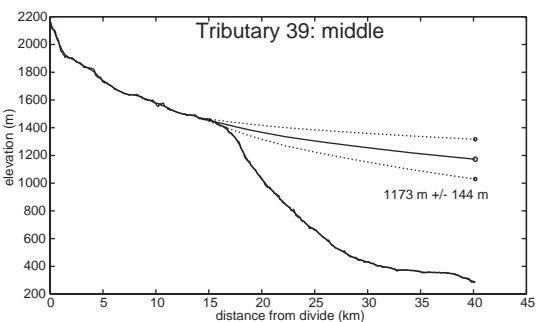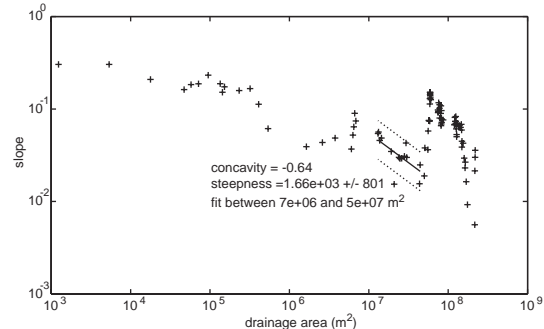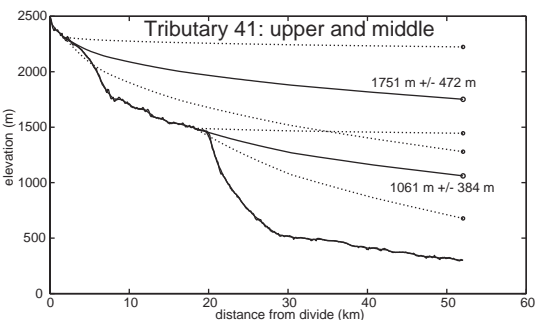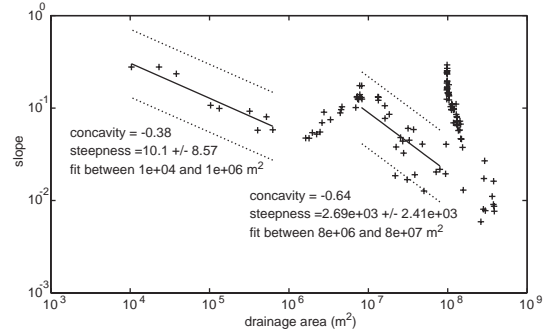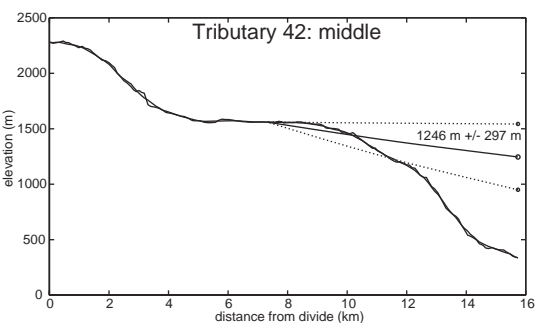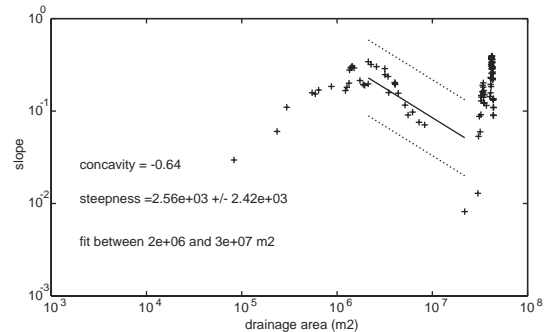

FIGURE DR3.4



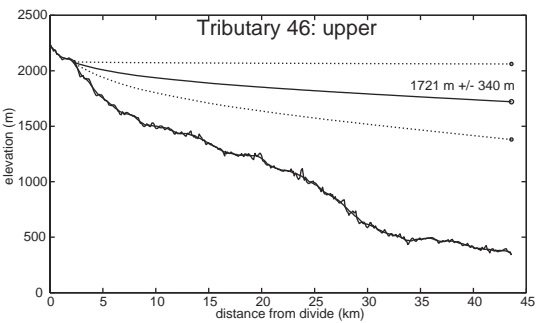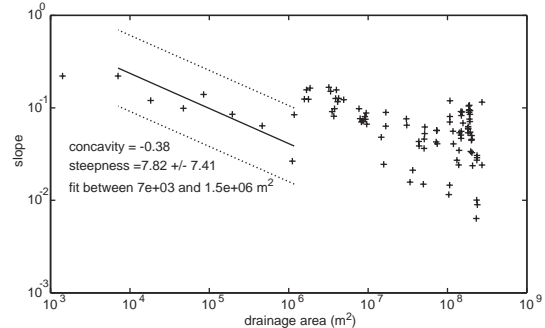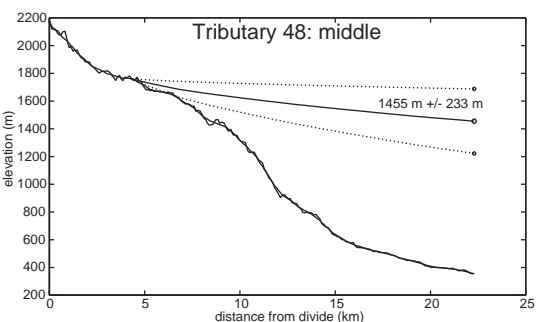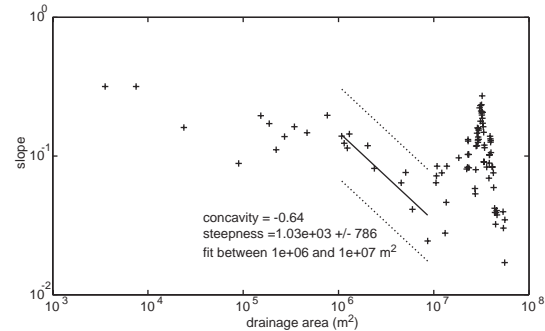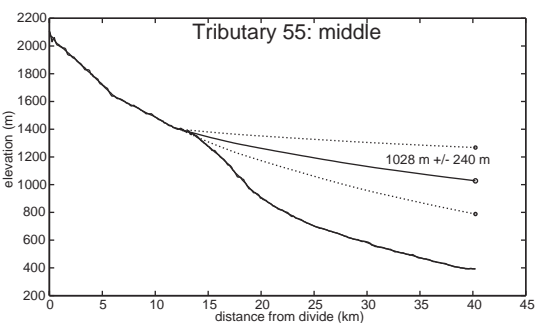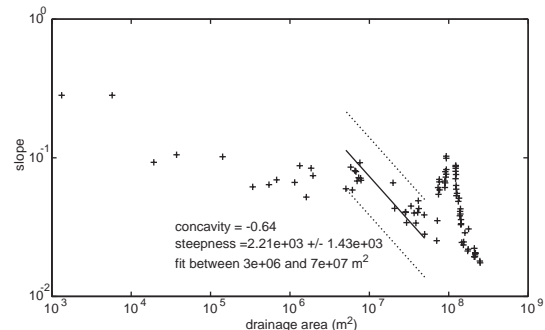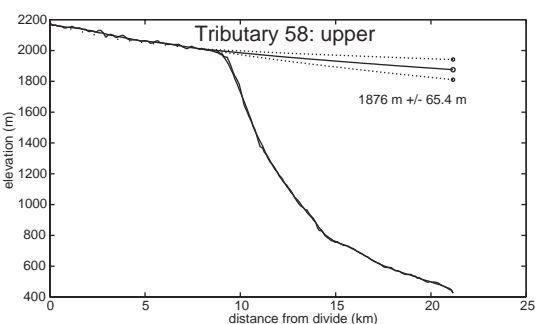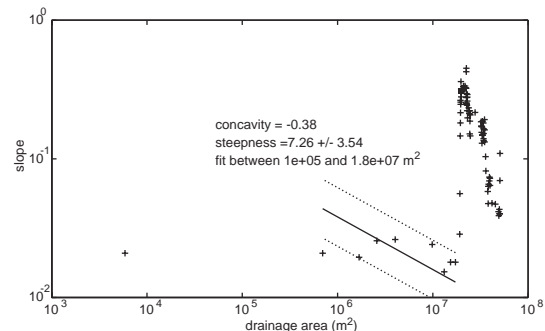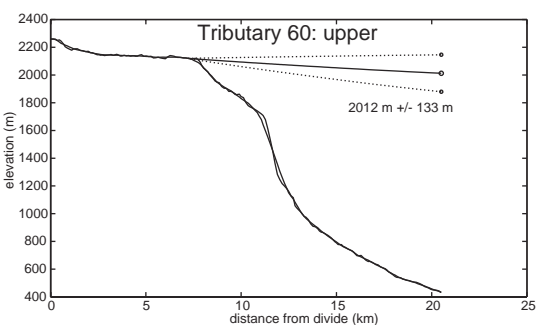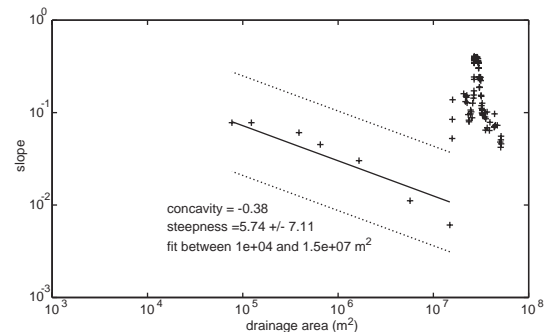

FIGURE DR3.5

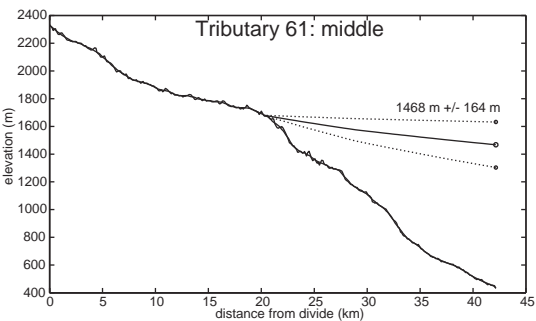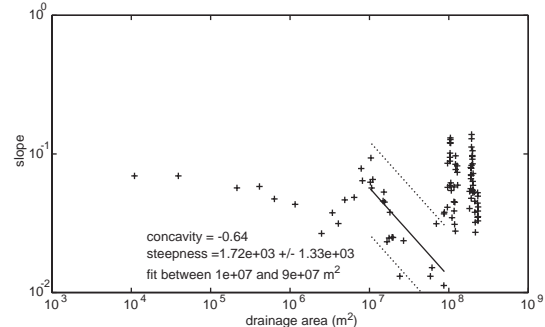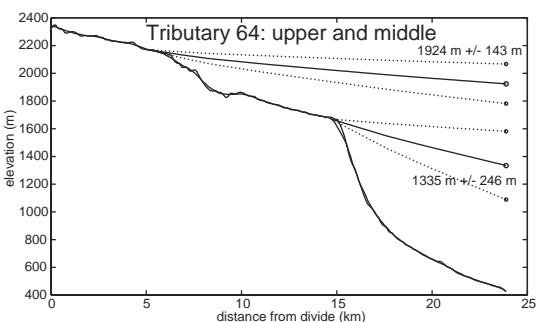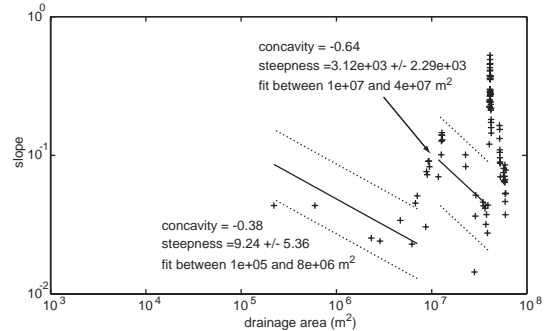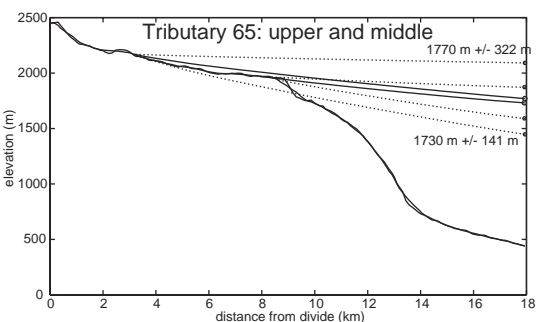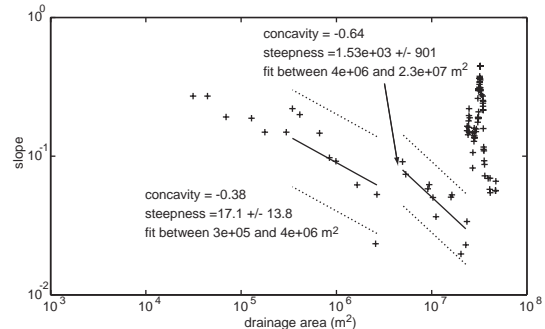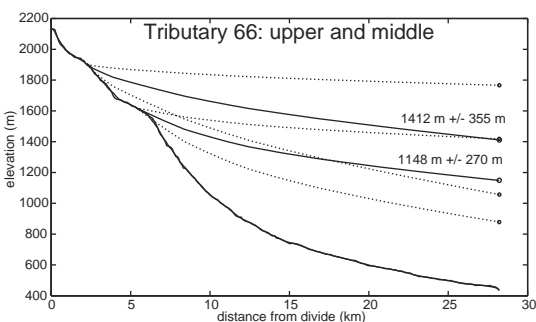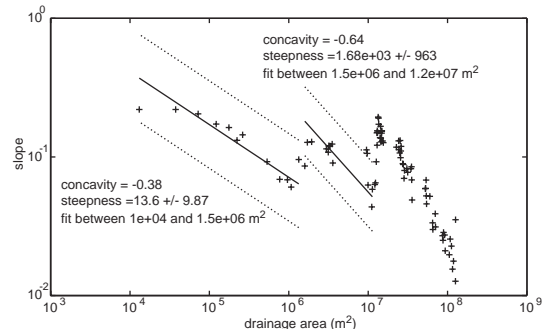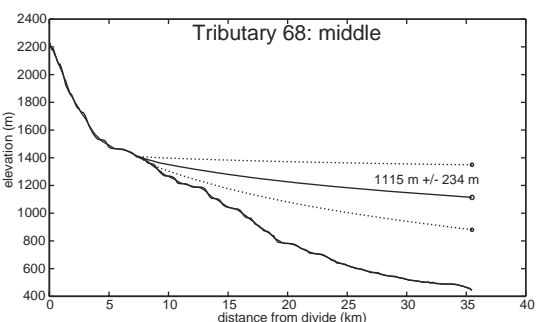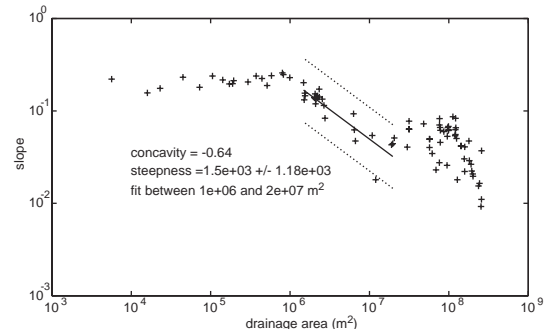

FIGURE DR3.6

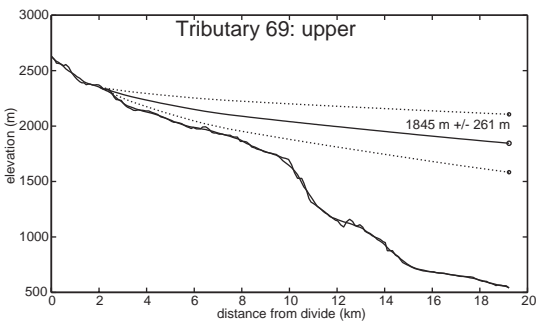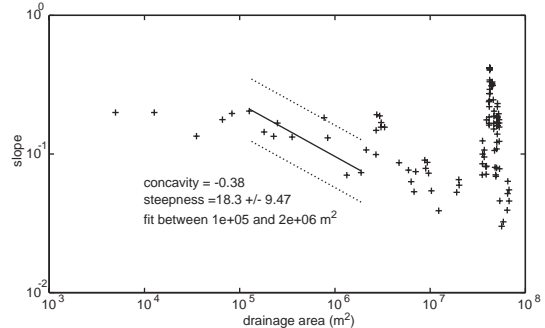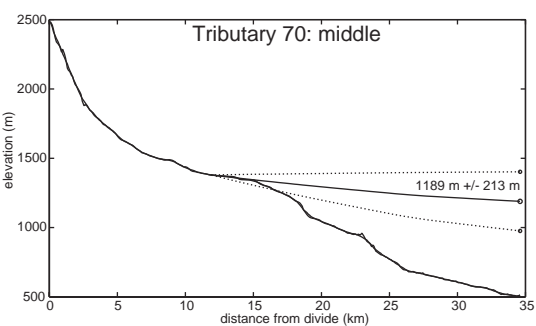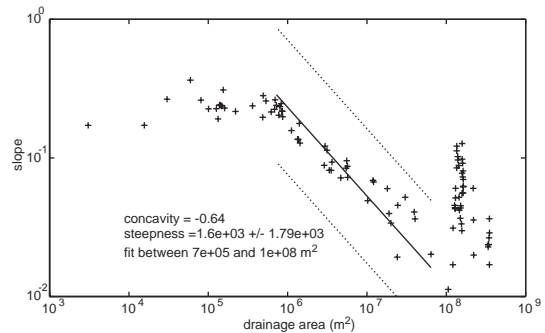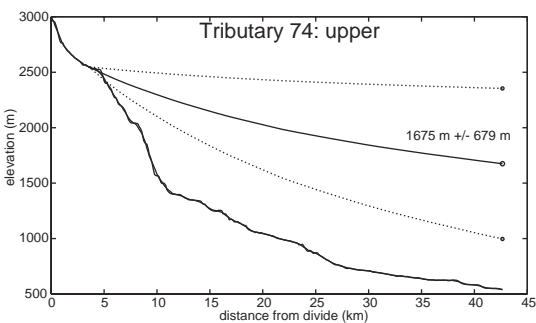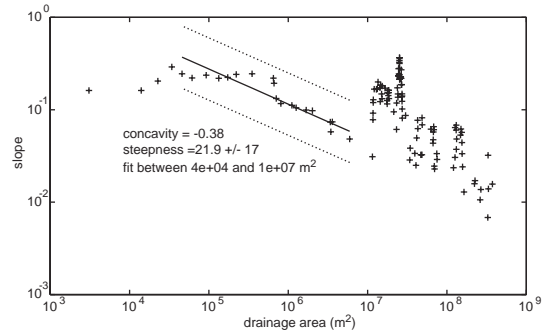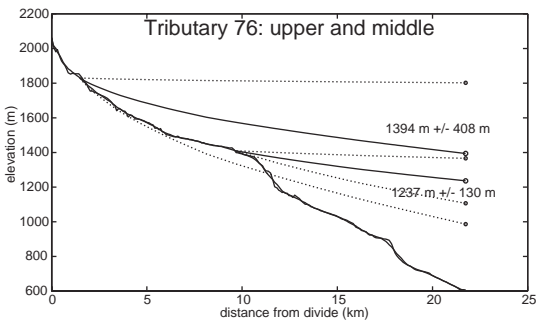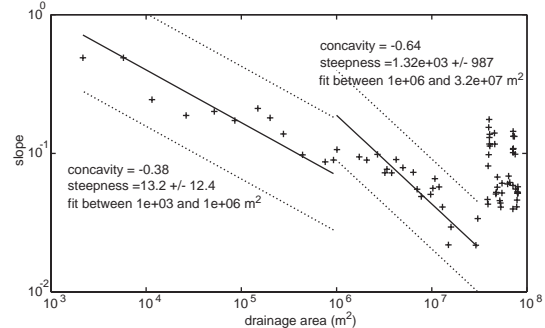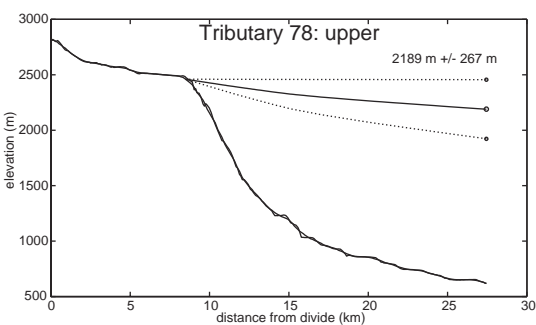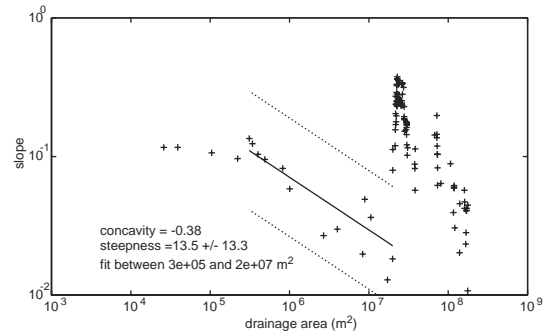

FIGURE DR3.7

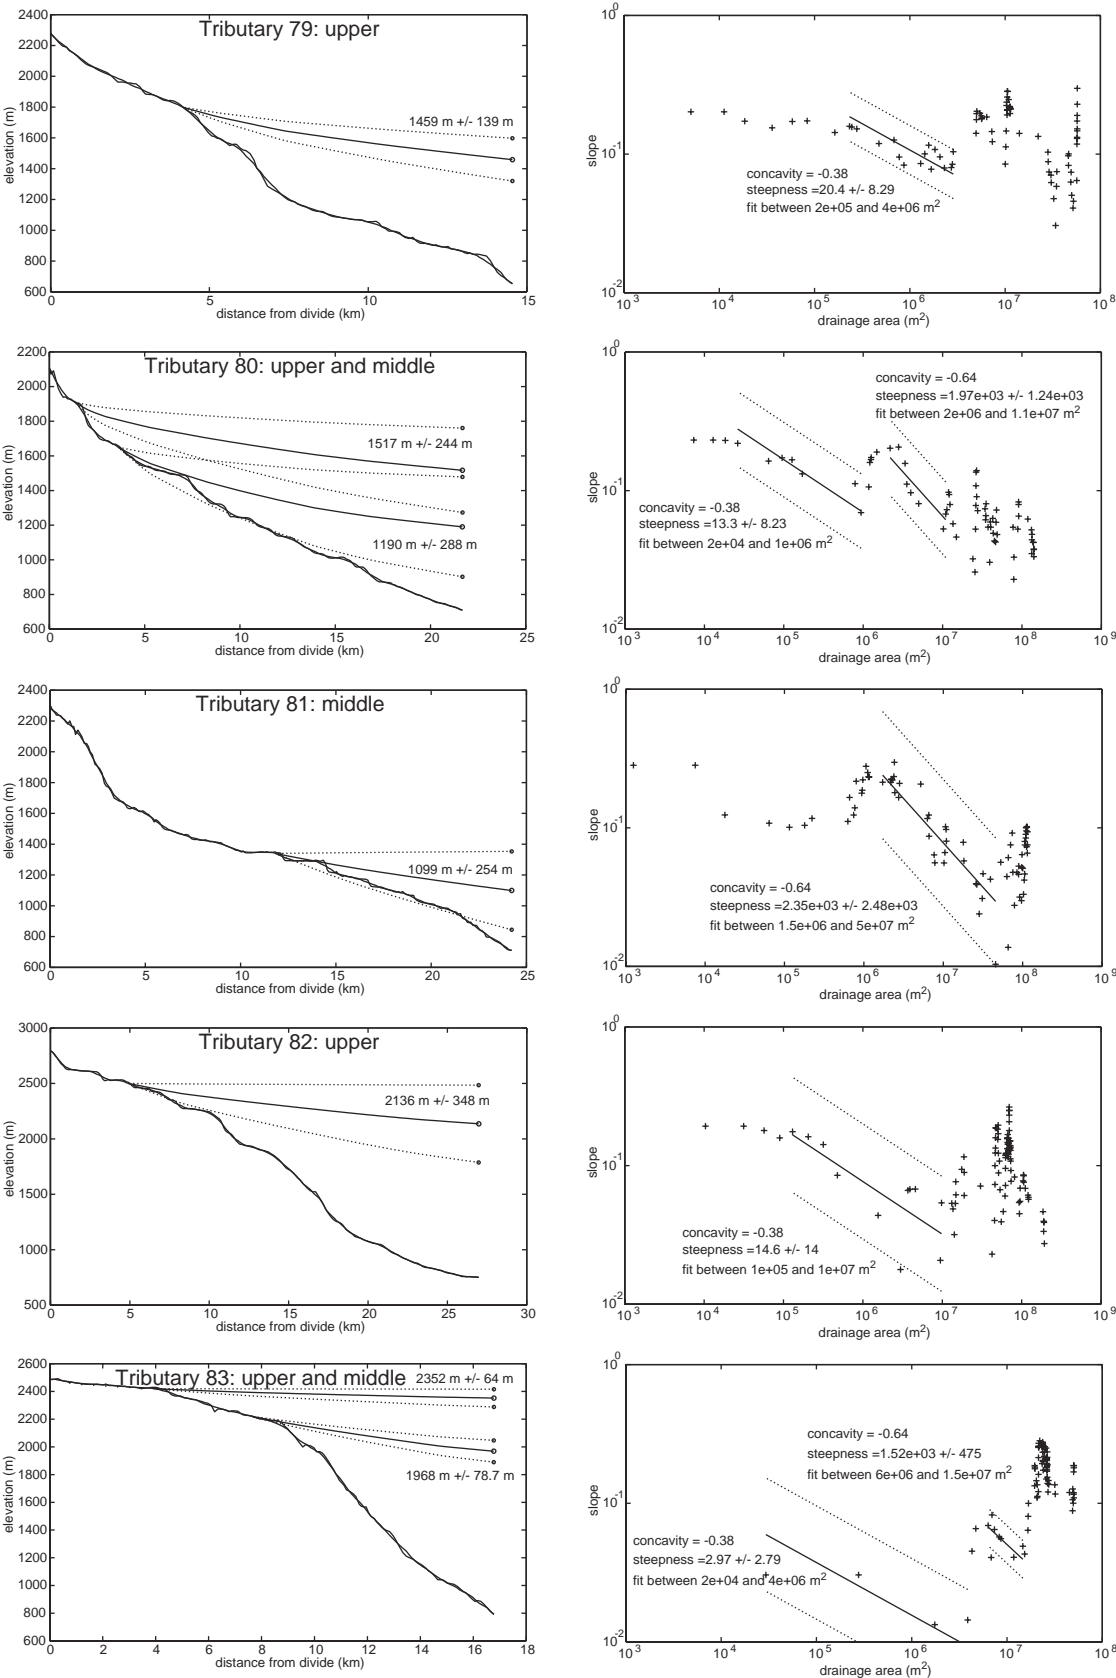

FIGURE DR3.8

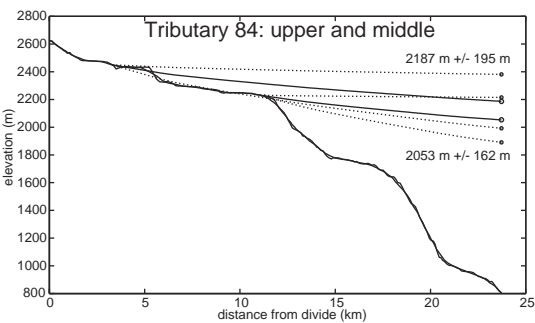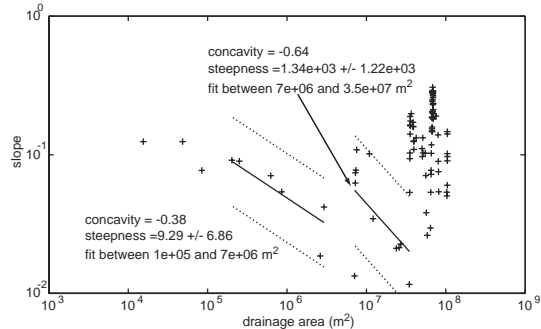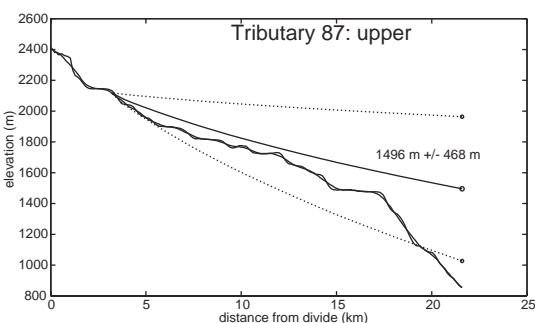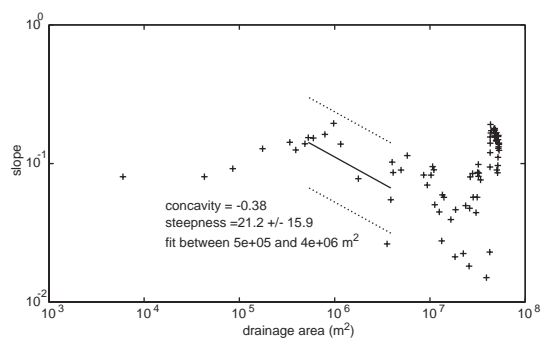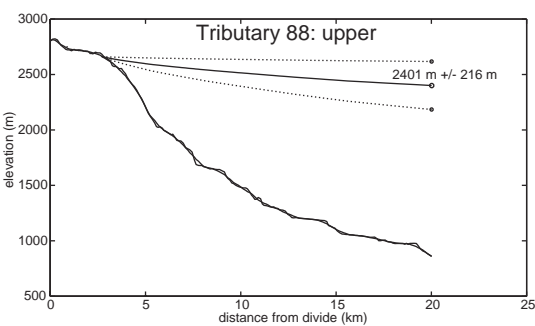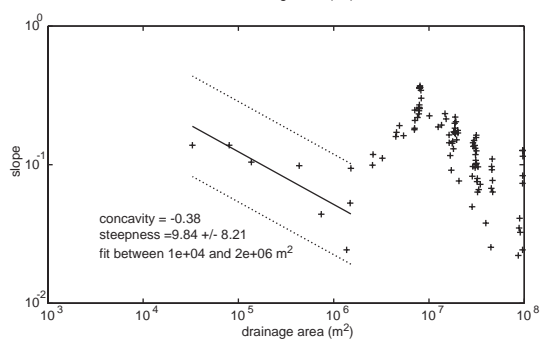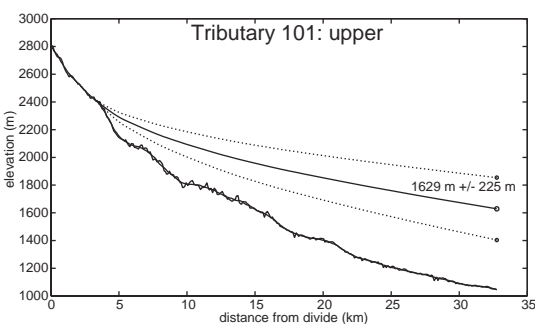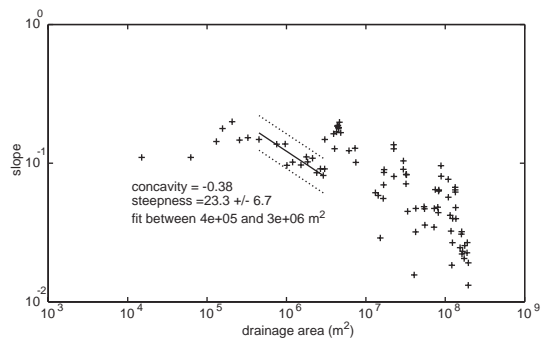

FIGURE DR3.9
